# Supplementary material
Source: PubMed Central journal article supplement (PMC6899222)
Supplement: NIHMS1029441-supplement-supp_info.pdf [file NIHMS1029441-supplement-supp_info.pdf]

## Return of the lysergamides. Part V: Analytical and behavioural characterization of 1-butanoyl-*D*-lysergic acid diethylamide (1B-LSD)

Simon D. Brandt,<sup>a,\*</sup> Pierce V. Kavanagh,<sup>b</sup> Folker Westphal,<sup>c</sup> Alexander Stratford,<sup>d</sup> Simon P. Elliott,<sup>e</sup> Geraldine Dowling,<sup>b,f</sup> Jason Wallach,<sup>g</sup> Adam L. Halberstadt,<sup>h</sup>

<sup>a</sup> School of Pharmacy and Biomolecular Sciences, Liverpool John Moores University, Byrom Street, Liverpool L3 3AF, UK

<sup>b</sup> Department of Pharmacology and Therapeutics, School of Medicine, Trinity Centre for Health Sciences, St. James Hospital, Dublin 8, Ireland

<sup>c</sup> State Bureau of Criminal Investigation Schleswig-Holstein, Section Narcotics/Toxicology, Mühlenweg 166, D-24116 Kiel, Germany

<sup>d</sup> Synex Synthetics BV, Karveelweg 20, 6222NH, Maastricht, The Netherlands

<sup>e</sup> Elliott Forensic Consulting, Birmingham, UK

<sup>f</sup> Department of Life Sciences, School of Science, Sligo Institute of Technology, Ash Lane, Sligo, F91YW50, Ireland

<sup>g</sup> Department of Pharmaceutical Sciences, Philadelphia College of Pharmacy, University of the Sciences, Philadelphia, PA 19104, USA

<sup>h</sup> Department of Psychiatry, University of California San Diego, La Jolla, CA 92093-0804, USA

\* Correspondence to: Simon D. Brandt, School of Pharmacy and Biomolecular Sciences, Liverpool John Moores University, Byrom Street, Liverpool, L3 3AF, UK. E-Mail: s.brandt@ljmu.ac.uk

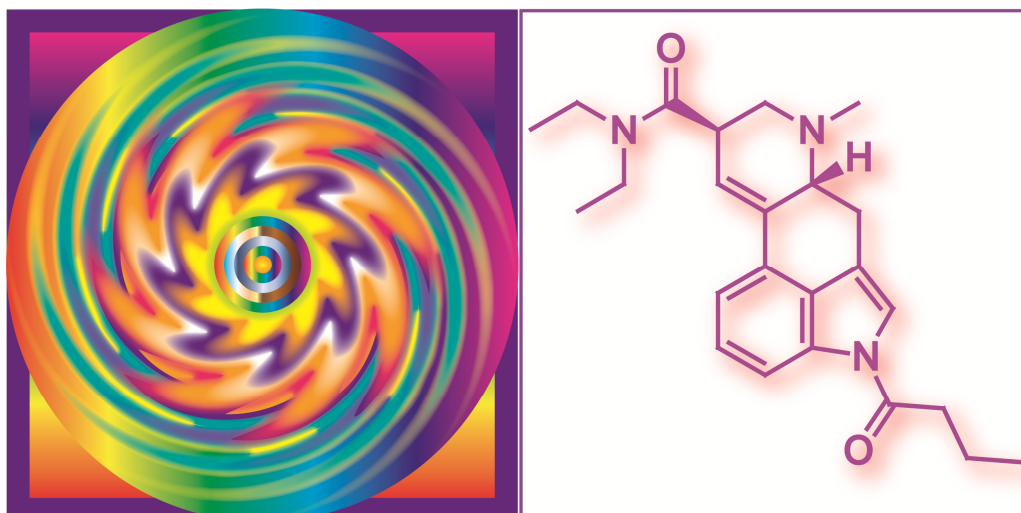

Supporting Information – Drug Testing and Analysis

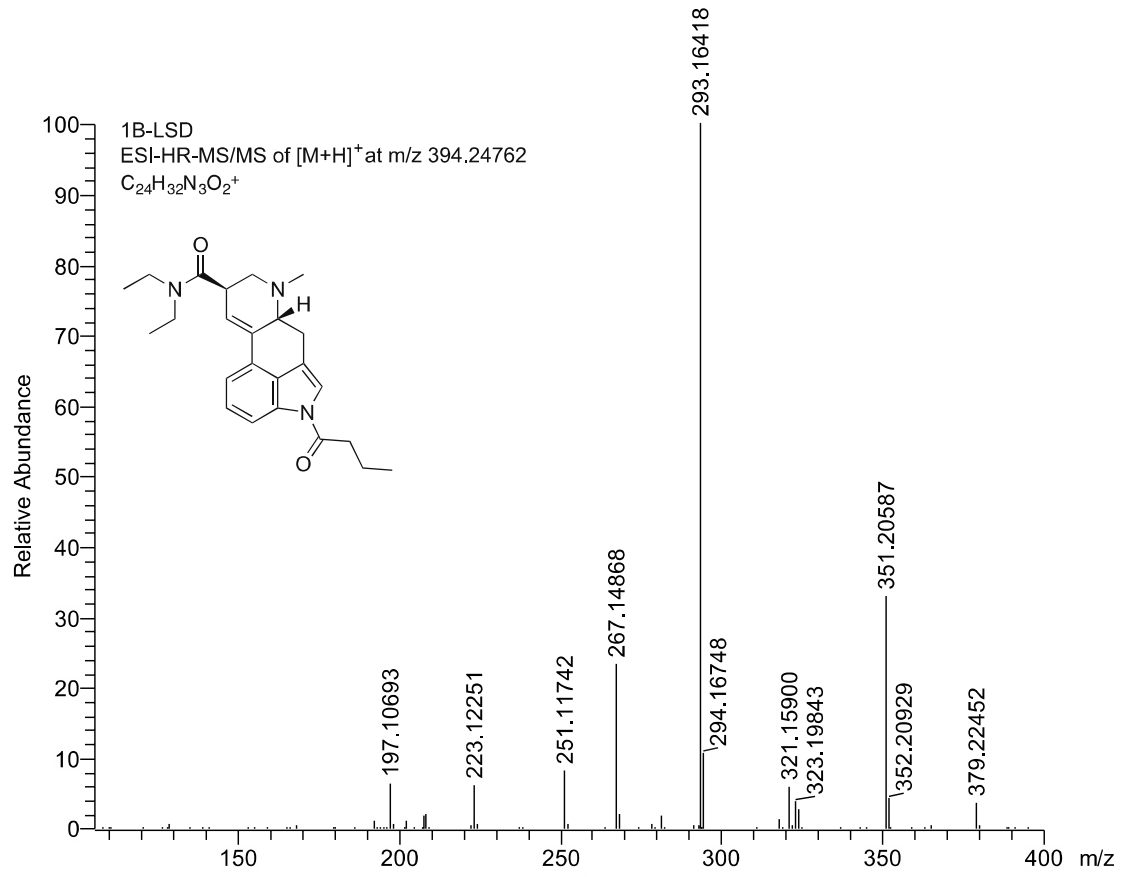

Supporting Information – Drug Testing and Analysis

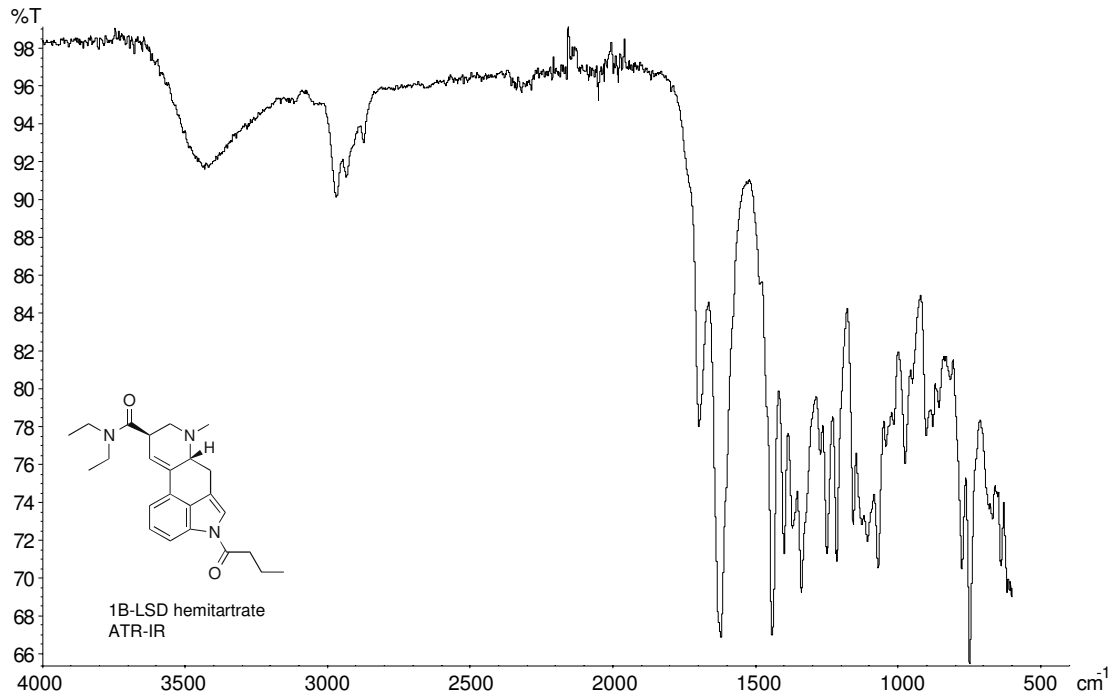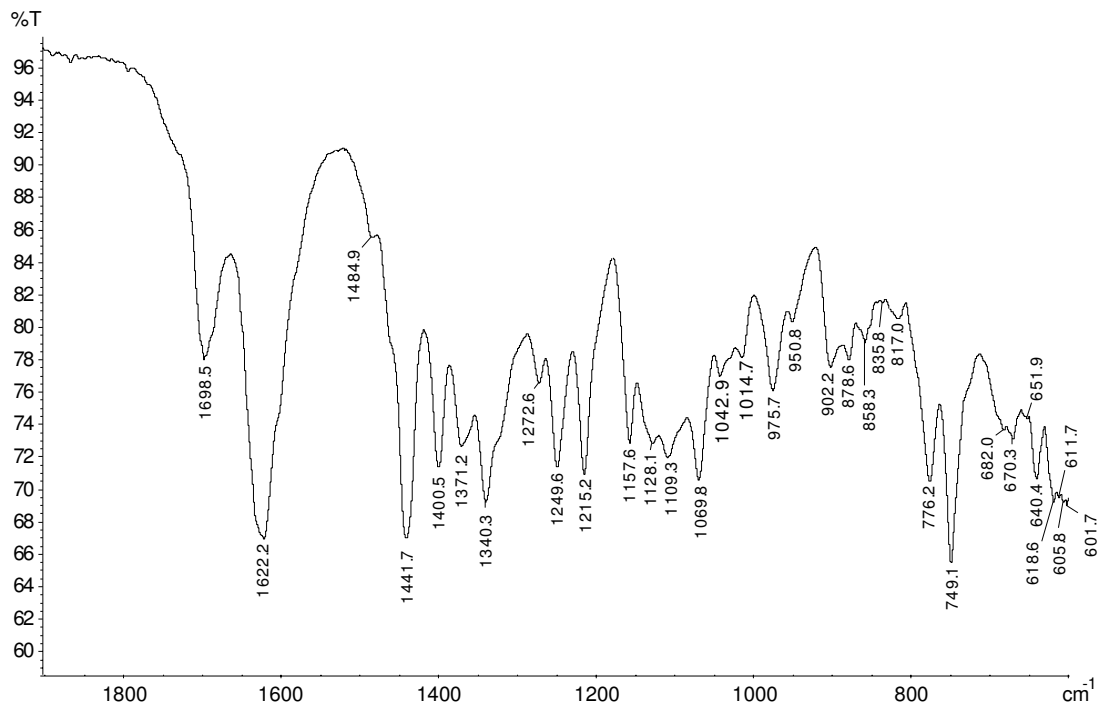

# Supporting Information – Drug Testing and Analysis

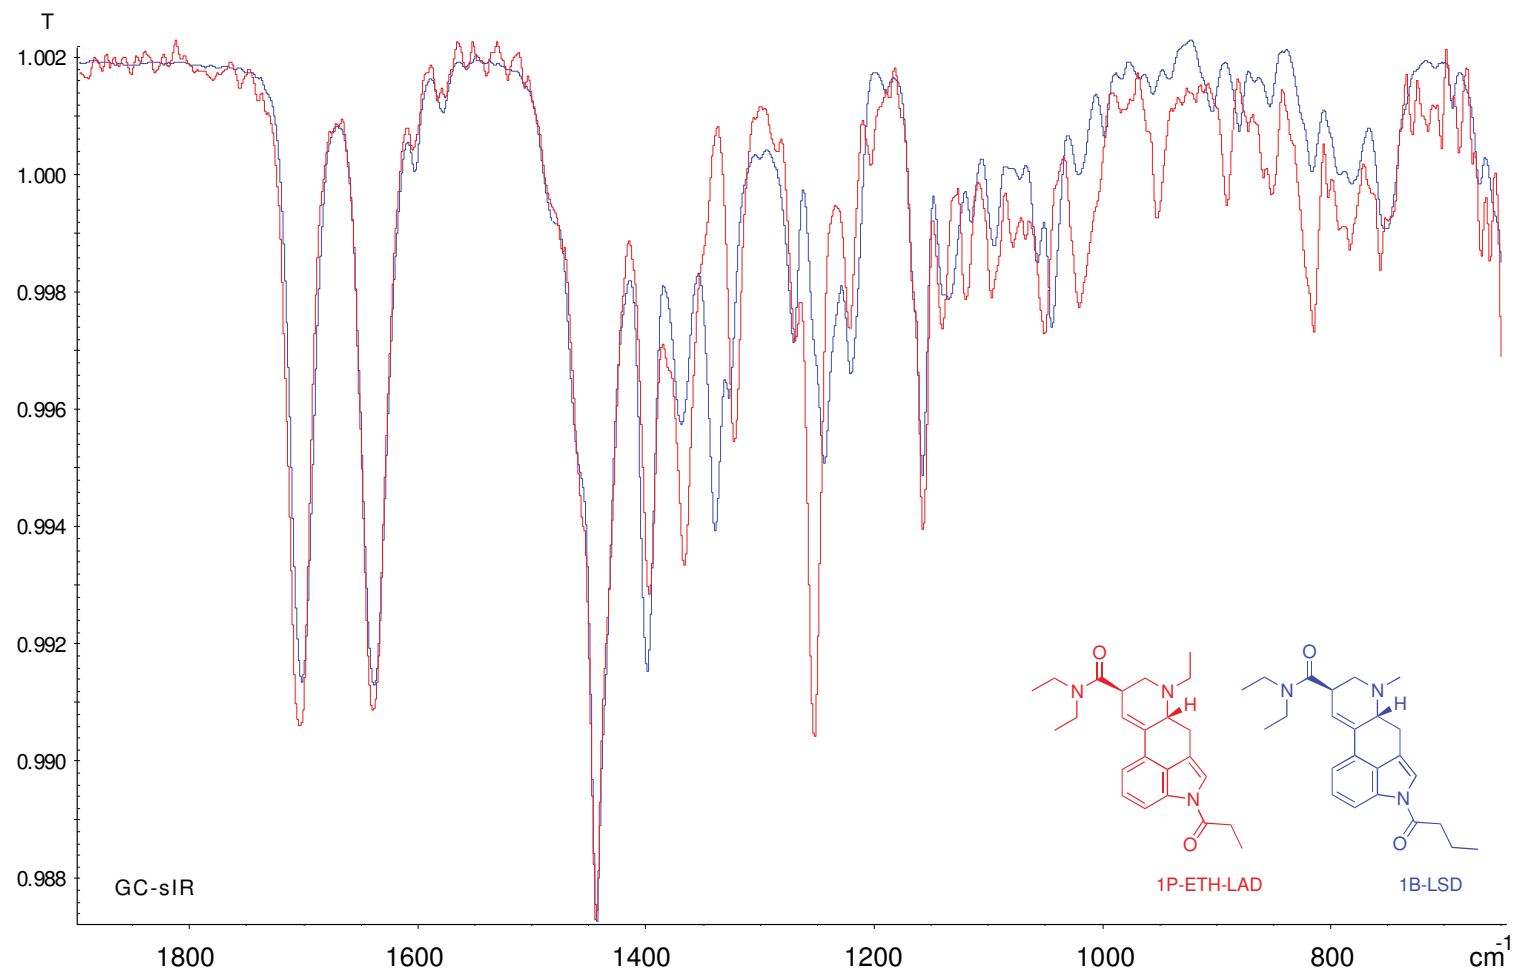

# Supporting Information – Drug Testing and Analysis

1B-LSD hemitartrate (2:1)  
<sup>1</sup>H-NMR (600 MHz)  
d<sub>6</sub>-DMSO

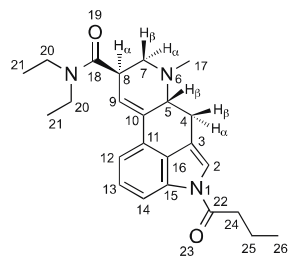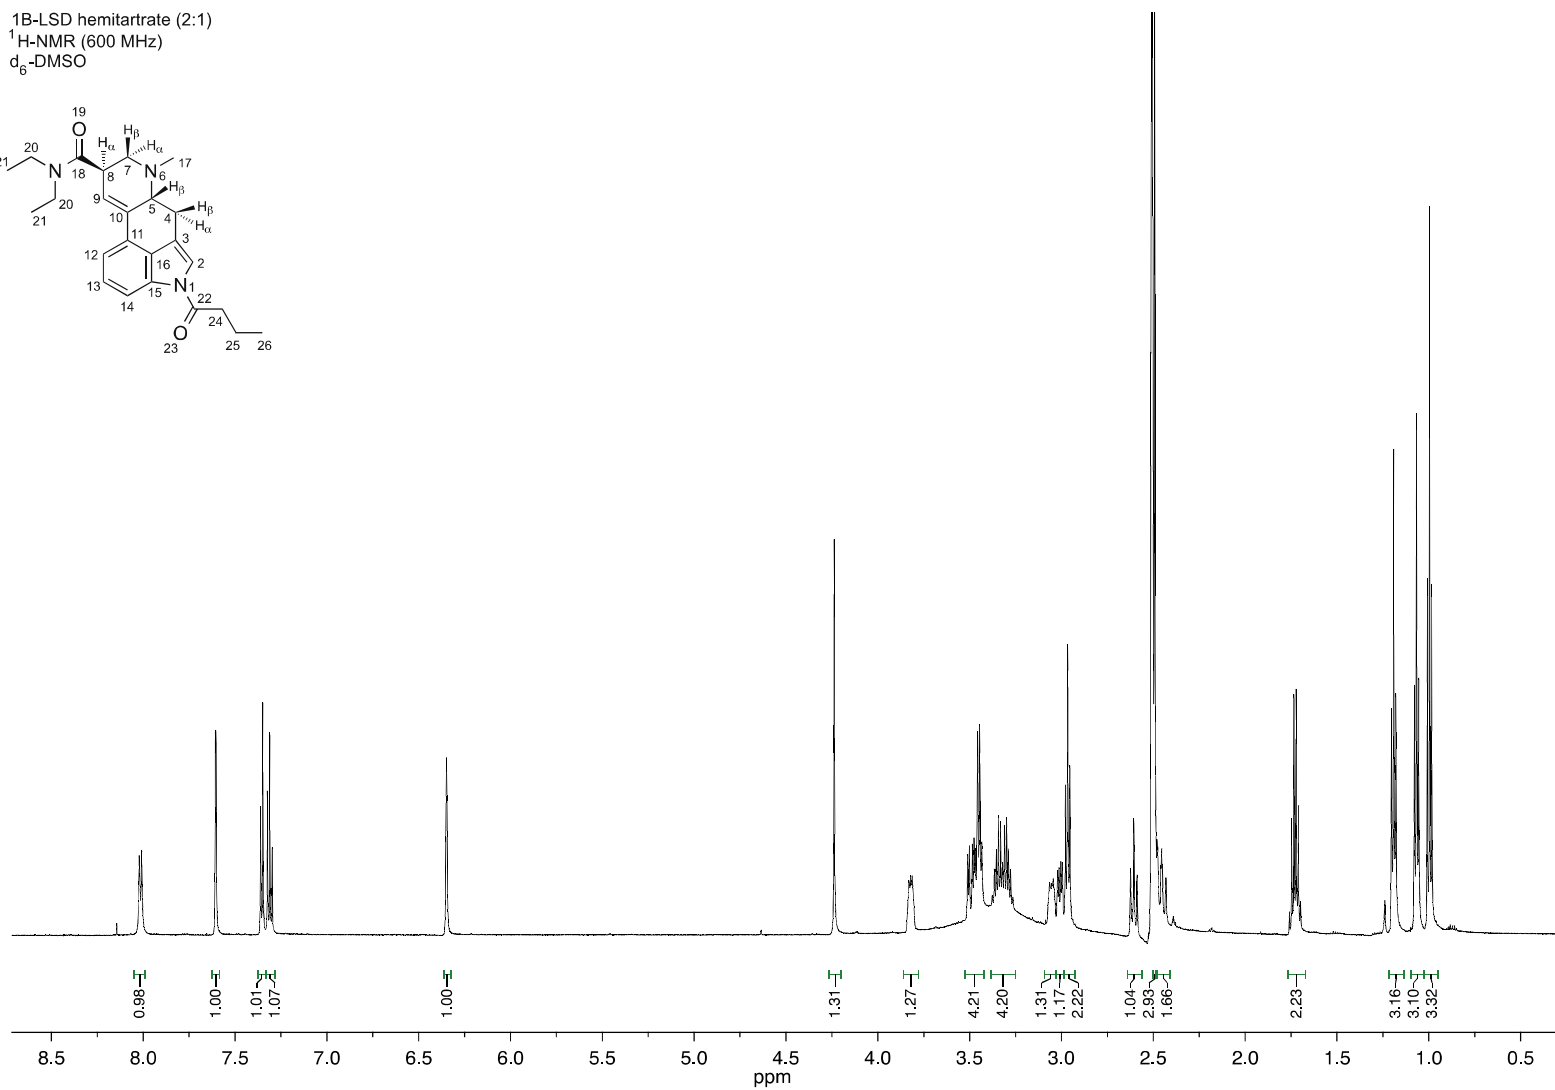

# Supporting Information – Drug Testing and Analysis

1B-LSD hemitartrate (2:1)  
<sup>1</sup>H-NMR (600 MHz)  
d<sub>6</sub>-DMSO

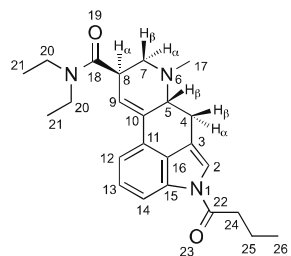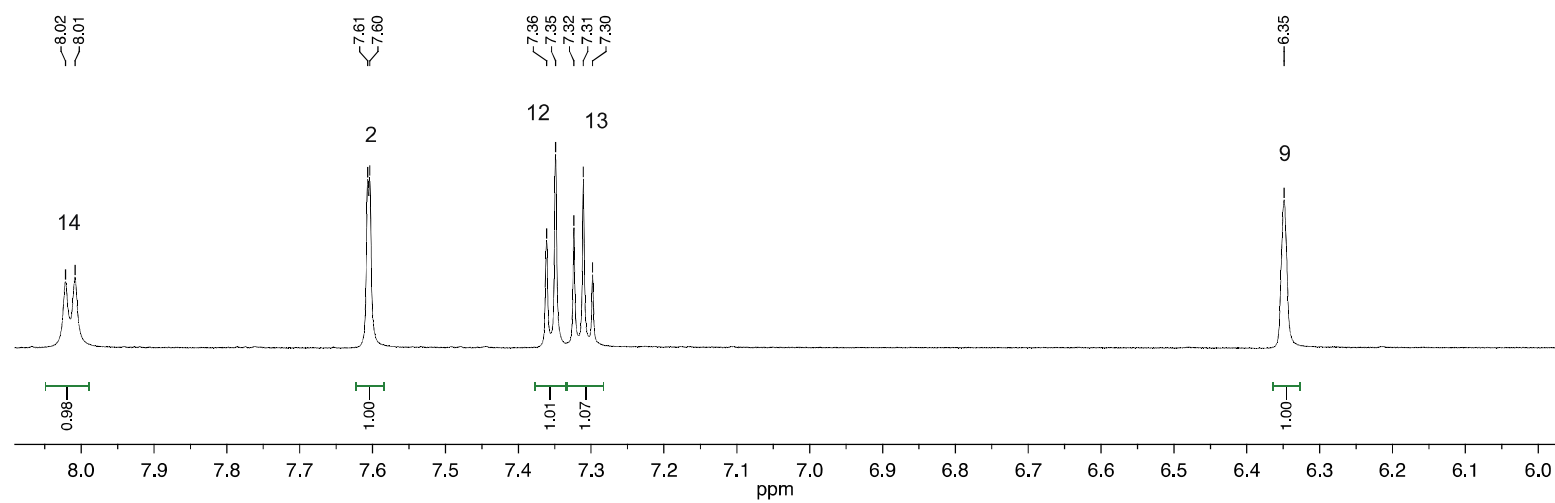

# Supporting Information – Drug Testing and Analysis

1B-LSD hemitartrate (2:1)  
<sup>1</sup>H-NMR (600 MHz)  
d<sub>6</sub>-DMSO

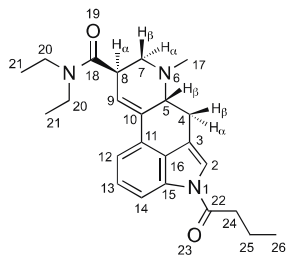

4.24  
 TA

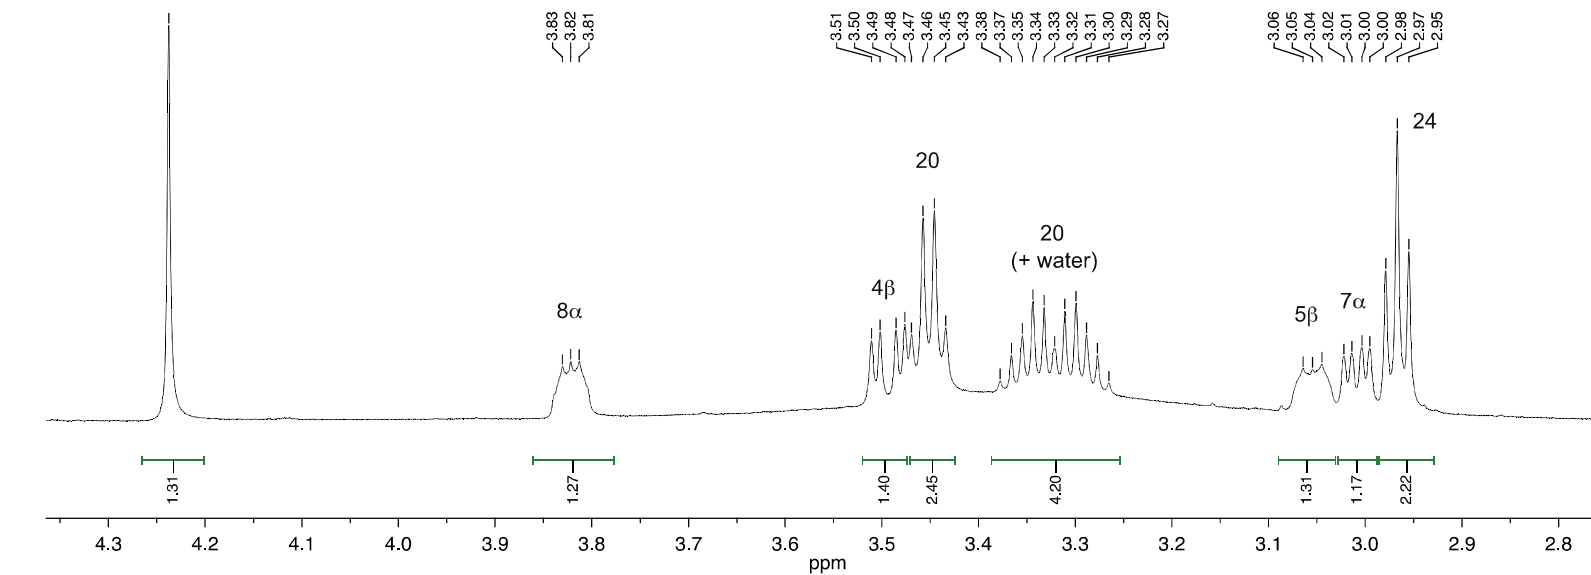

TA = Tartaric acid

# Supporting Information – Drug Testing and Analysis

1B-LSD hemitartrate (2:1)  
<sup>1</sup>H-NMR (600 MHz)  
d<sub>6</sub>-DMSO

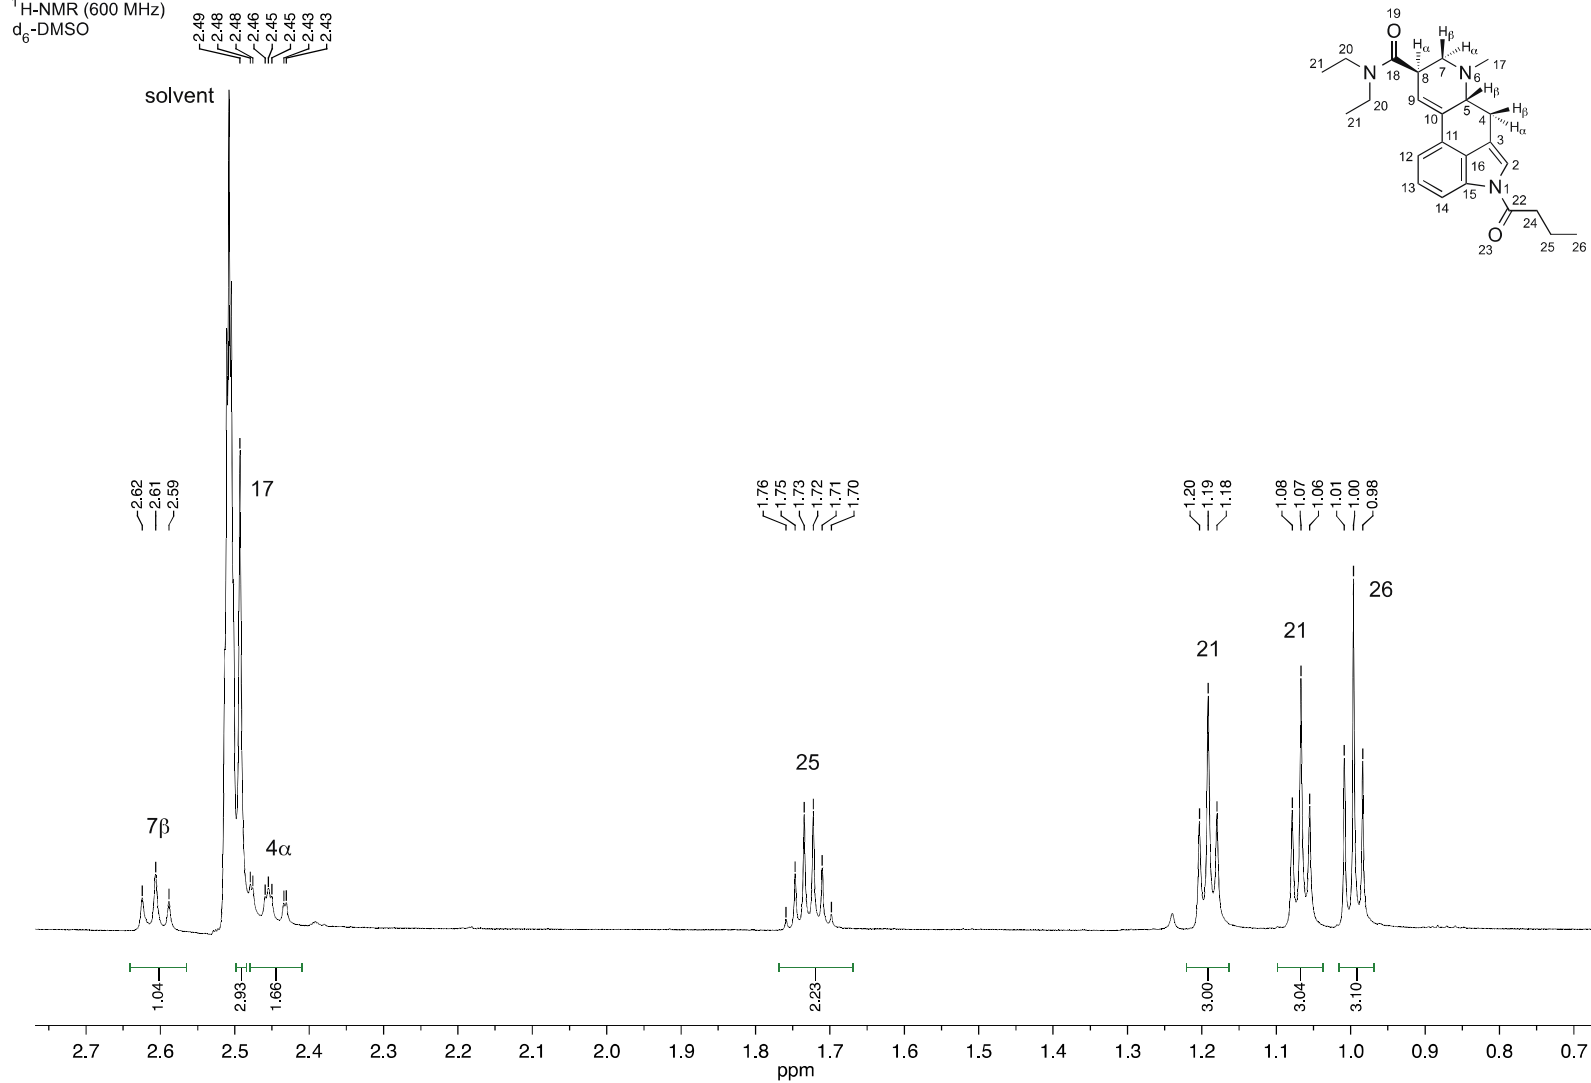



# Supporting Information – Drug Testing and Analysis

1B-LSD hemitartrate (2:1)  
COSY (600 MHz)  
d<sub>6</sub>-DMSO

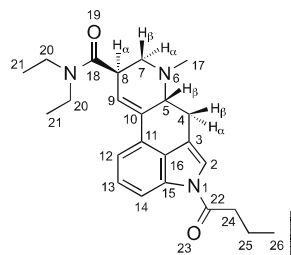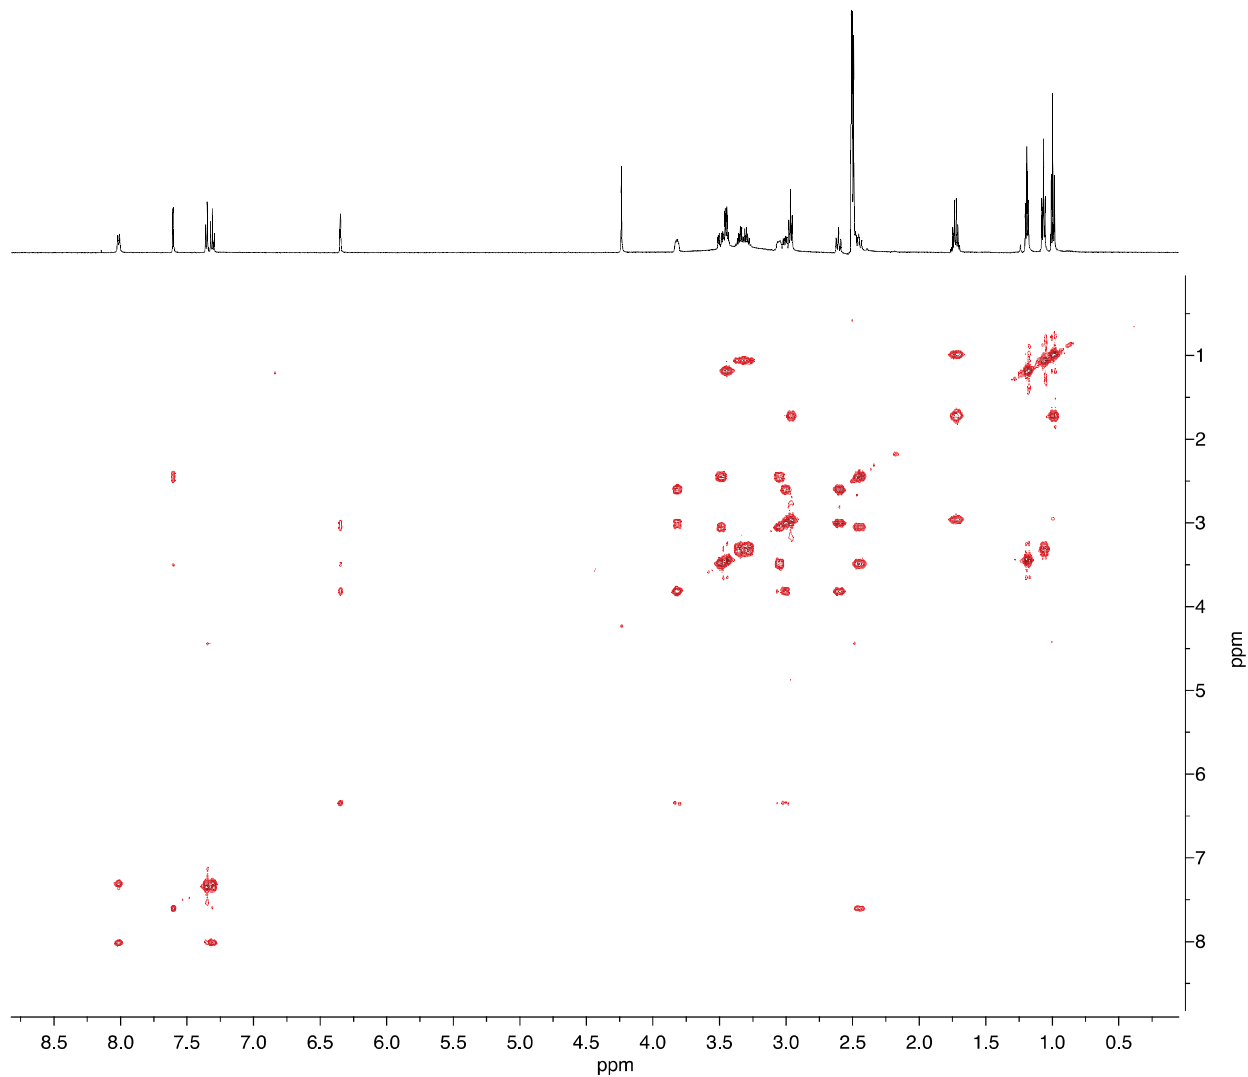

# Supporting Information – Drug Testing and Analysis

1B-LSD hemitartrate (2:1)  
 COSY (600 MHz)  
 d<sub>6</sub>-DMSO

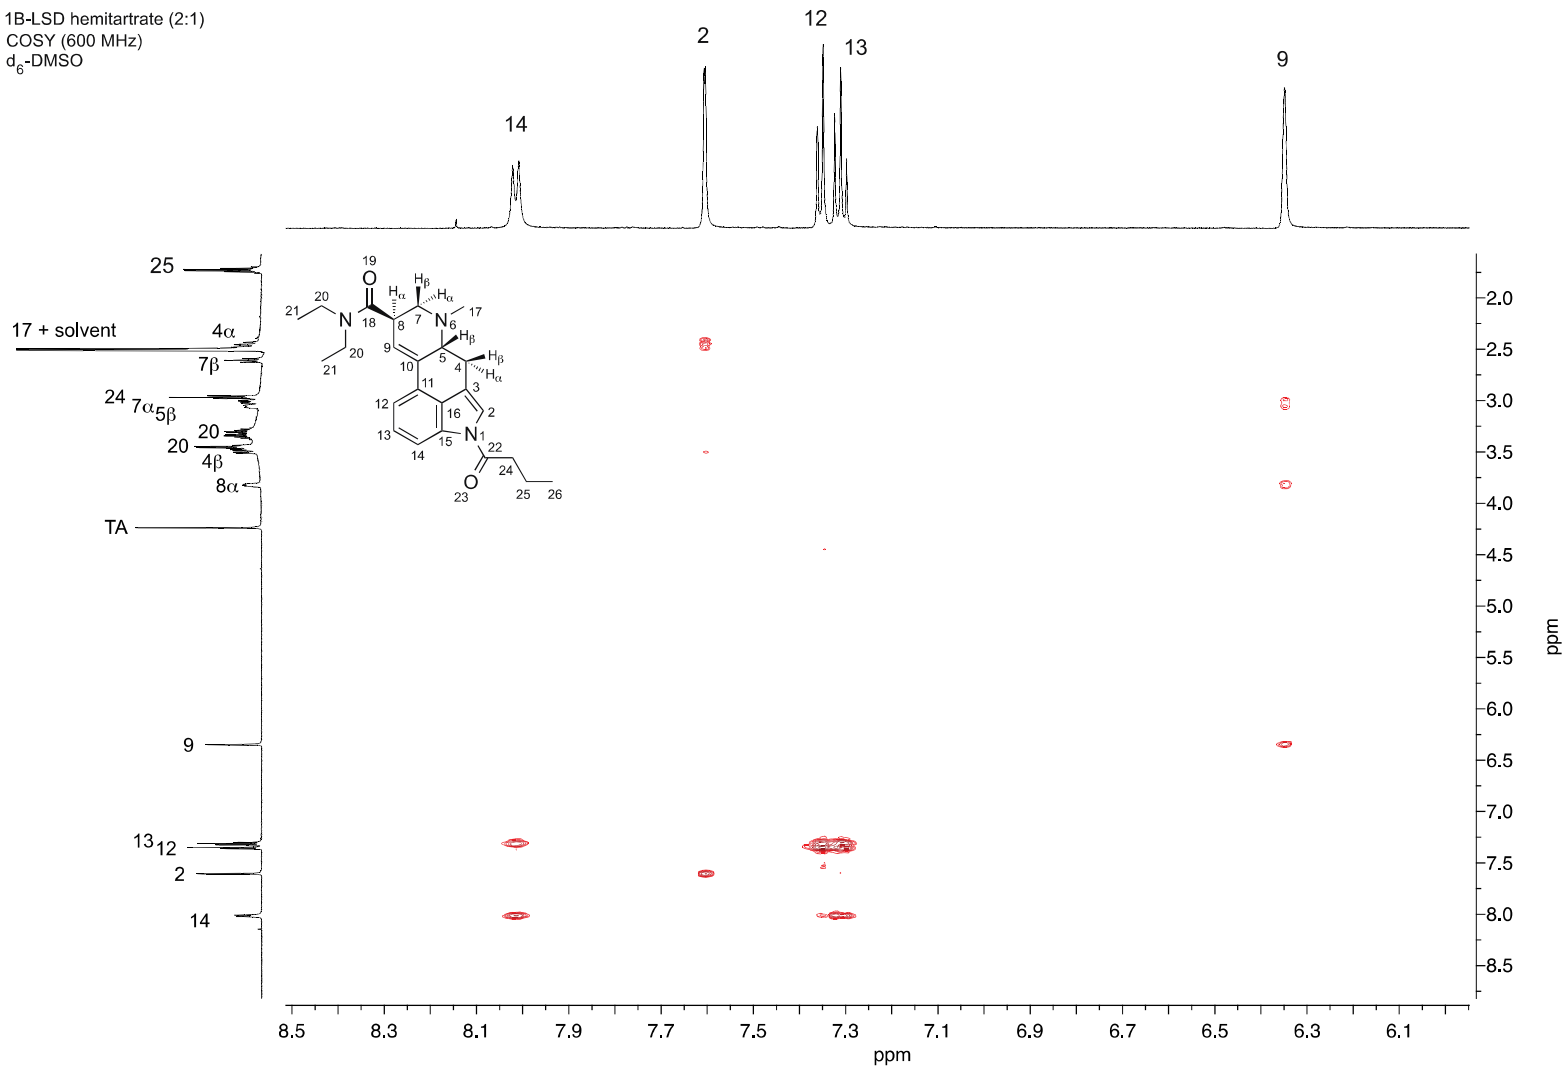

TA = Tartaric acid

# Supporting Information – Drug Testing and Analysis

1B-LSD hemitartrate (2:1)  
 COSY (600 MHz)  
 d<sub>6</sub>-DMSO

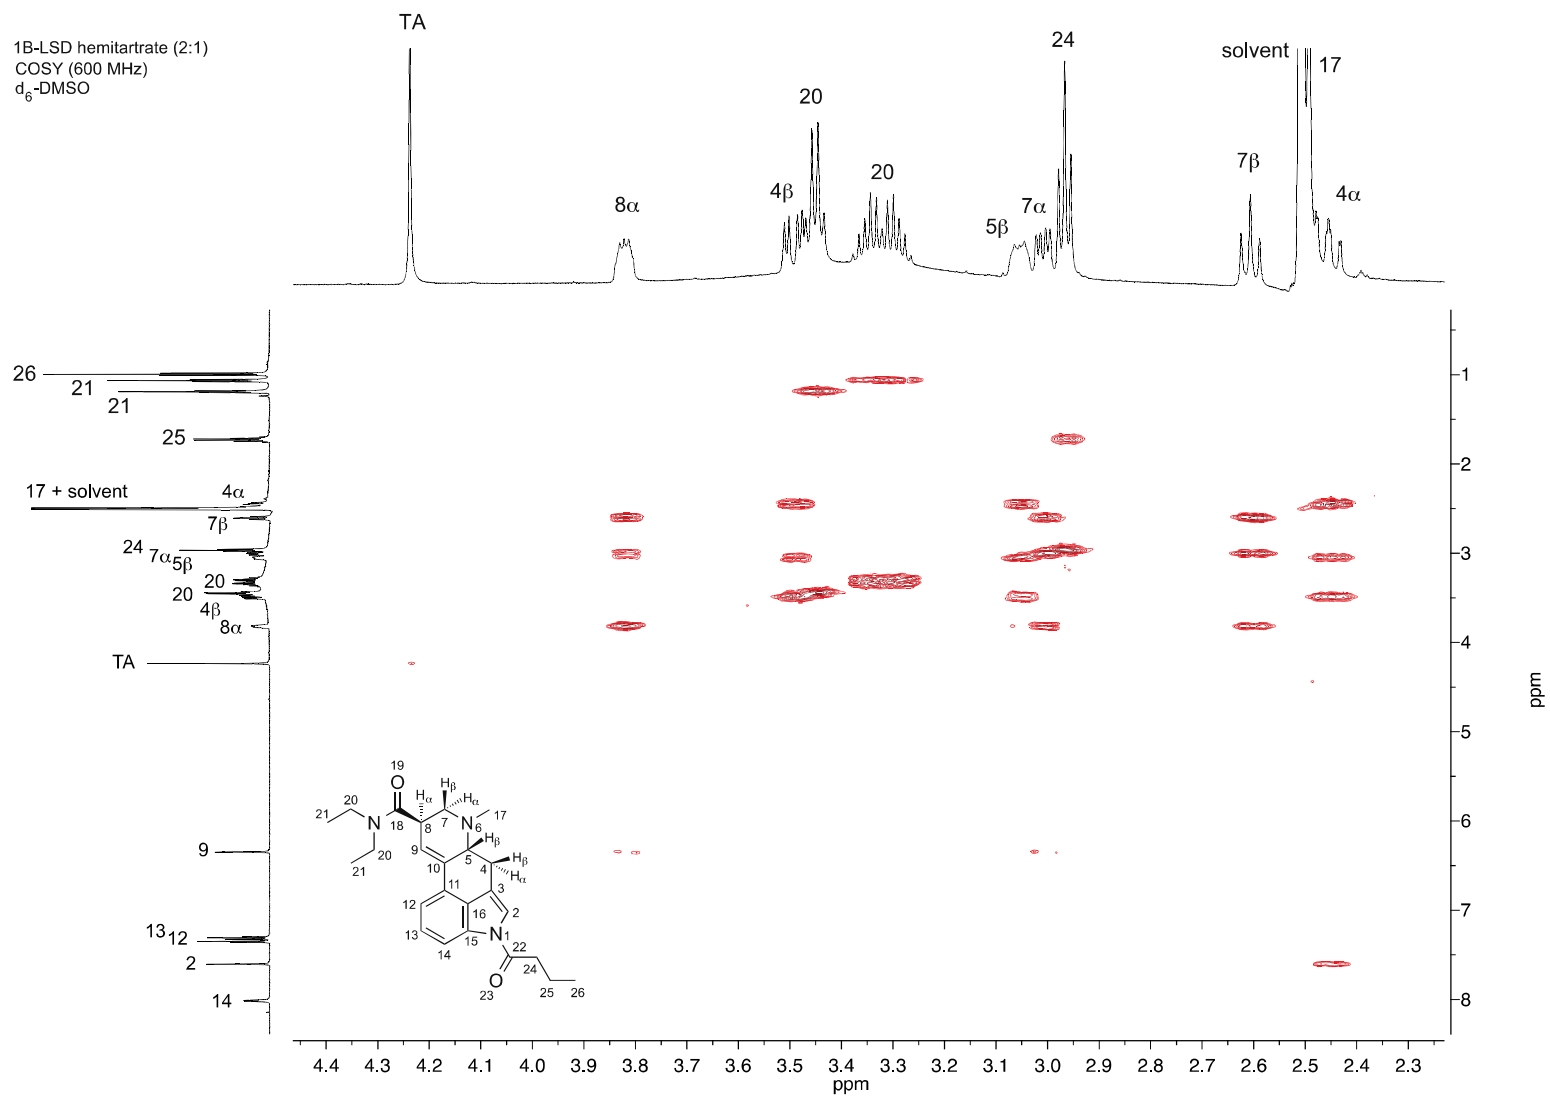

TA = Tartaric acid

# Supporting Information – Drug Testing and Analysis

1B-LSD hemitartrate (2:1)  
 COSY (600 MHz)  
 d<sub>6</sub>-DMSO

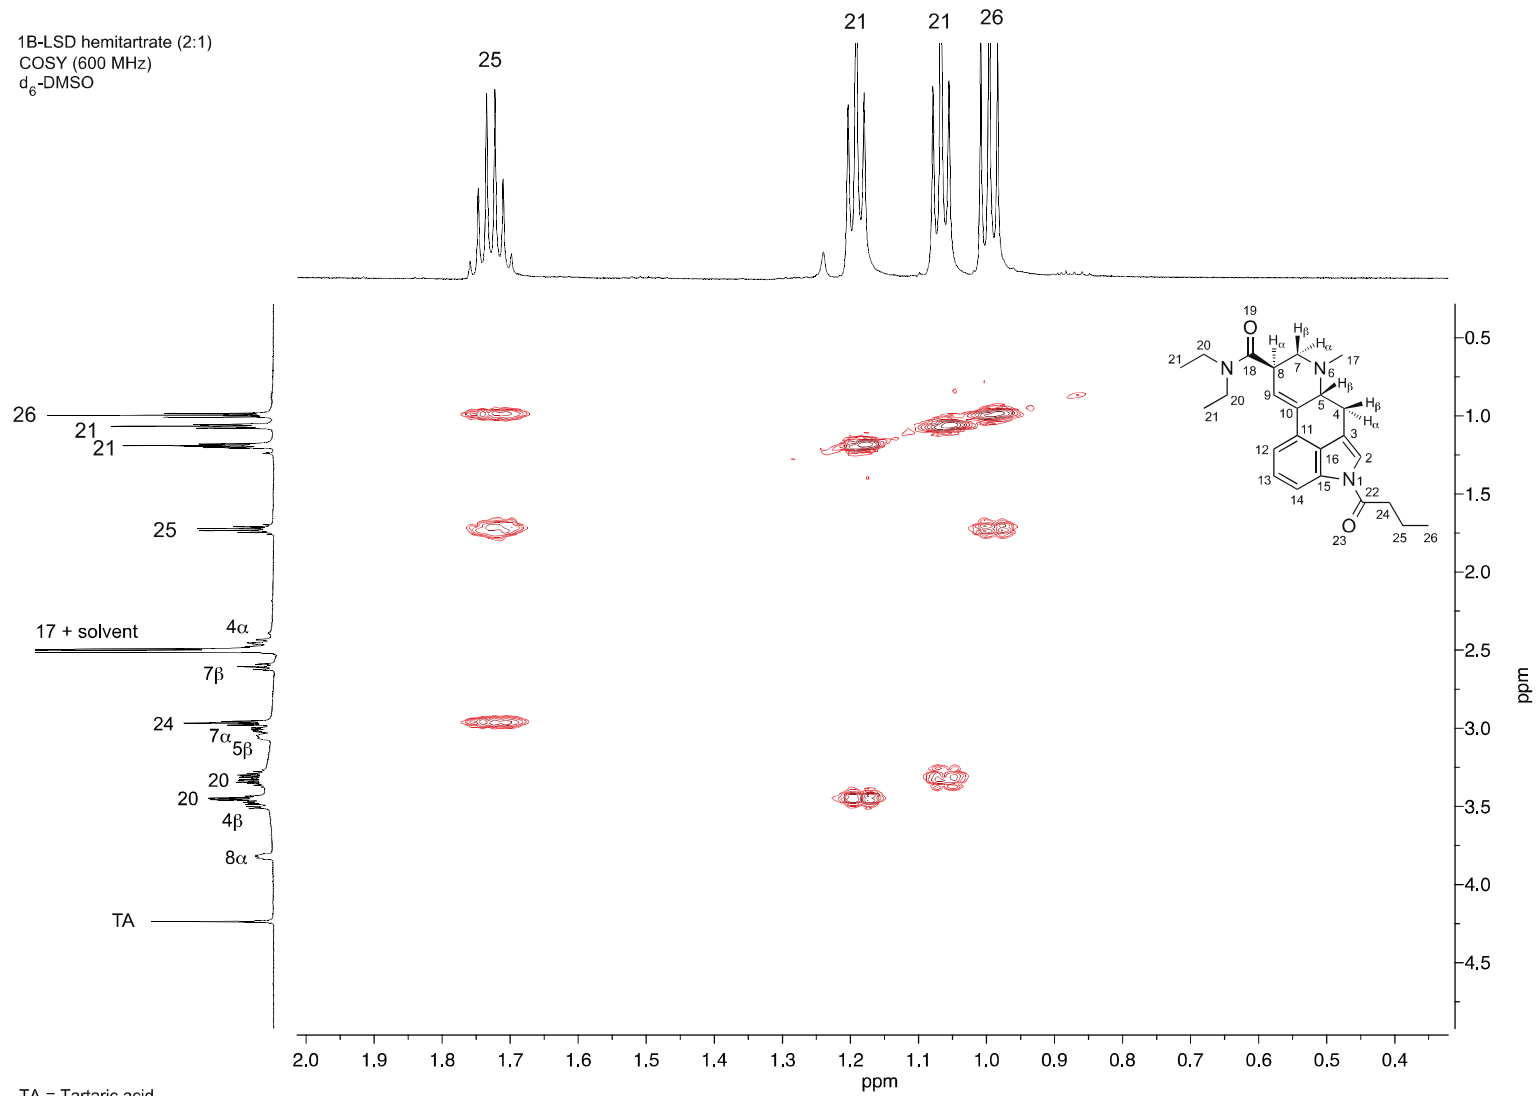

TA = Tartaric acid

# Supporting Information – Drug Testing and Analysis

1B-LSD hemitartrate (2:1)  
<sup>13</sup>C-NMR (150 MHz)  
d<sub>6</sub>-DMSO

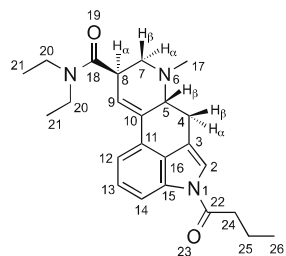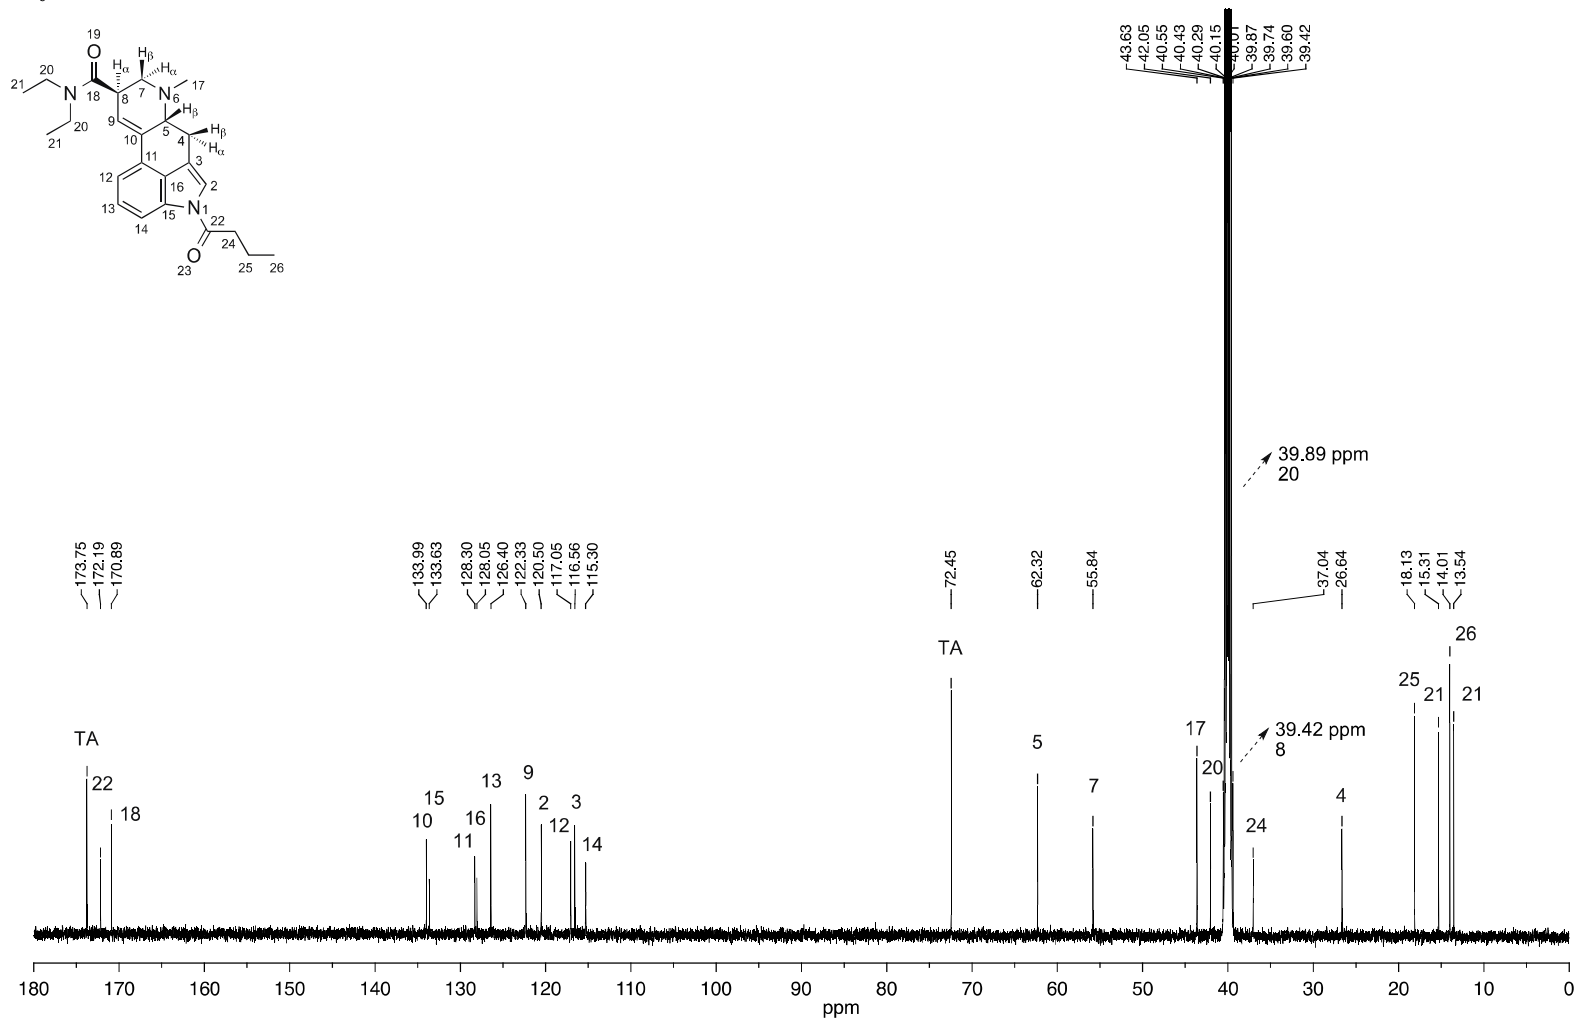

TA = Tartaric acid

# Supporting Information – Drug Testing and Analysis

1B-LSD hemitartrate (2:1)  
HSQC (600/150 MHz)  
d<sub>6</sub>-DMSO

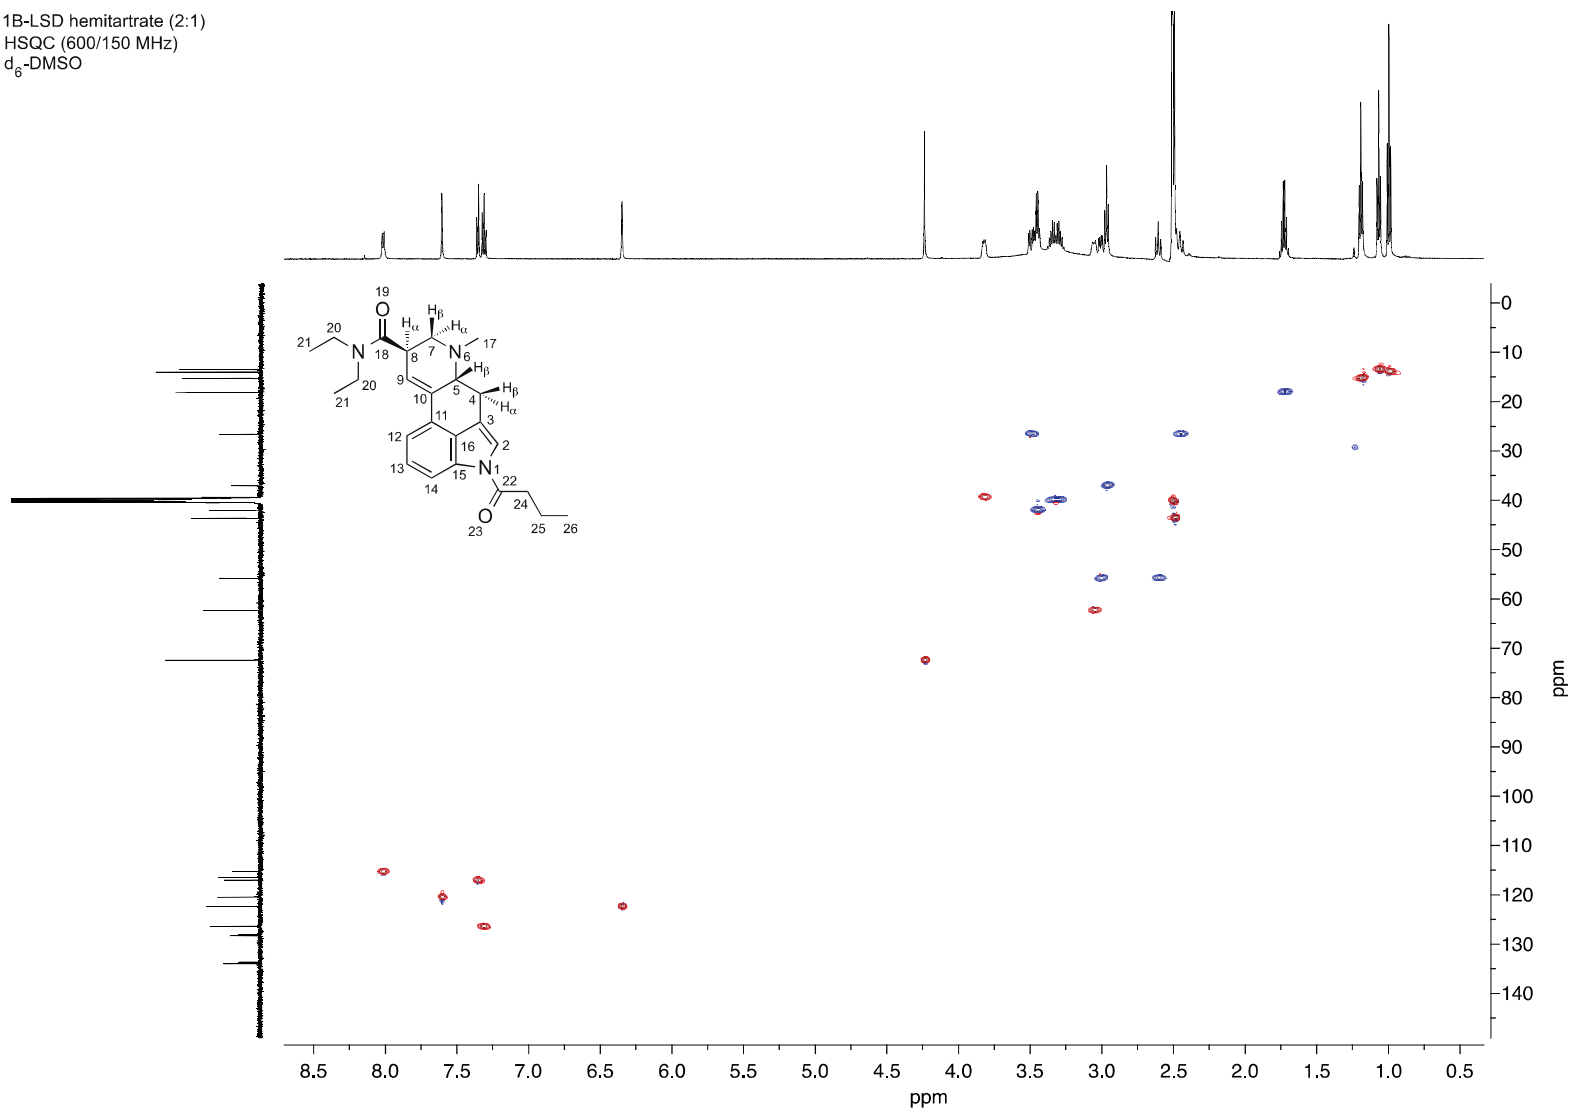

# Supporting Information – Drug Testing and Analysis

1B-LSD hemitartrate (2:1)  
HSQC (600/150 MHz)  
d<sub>6</sub>-DMSO

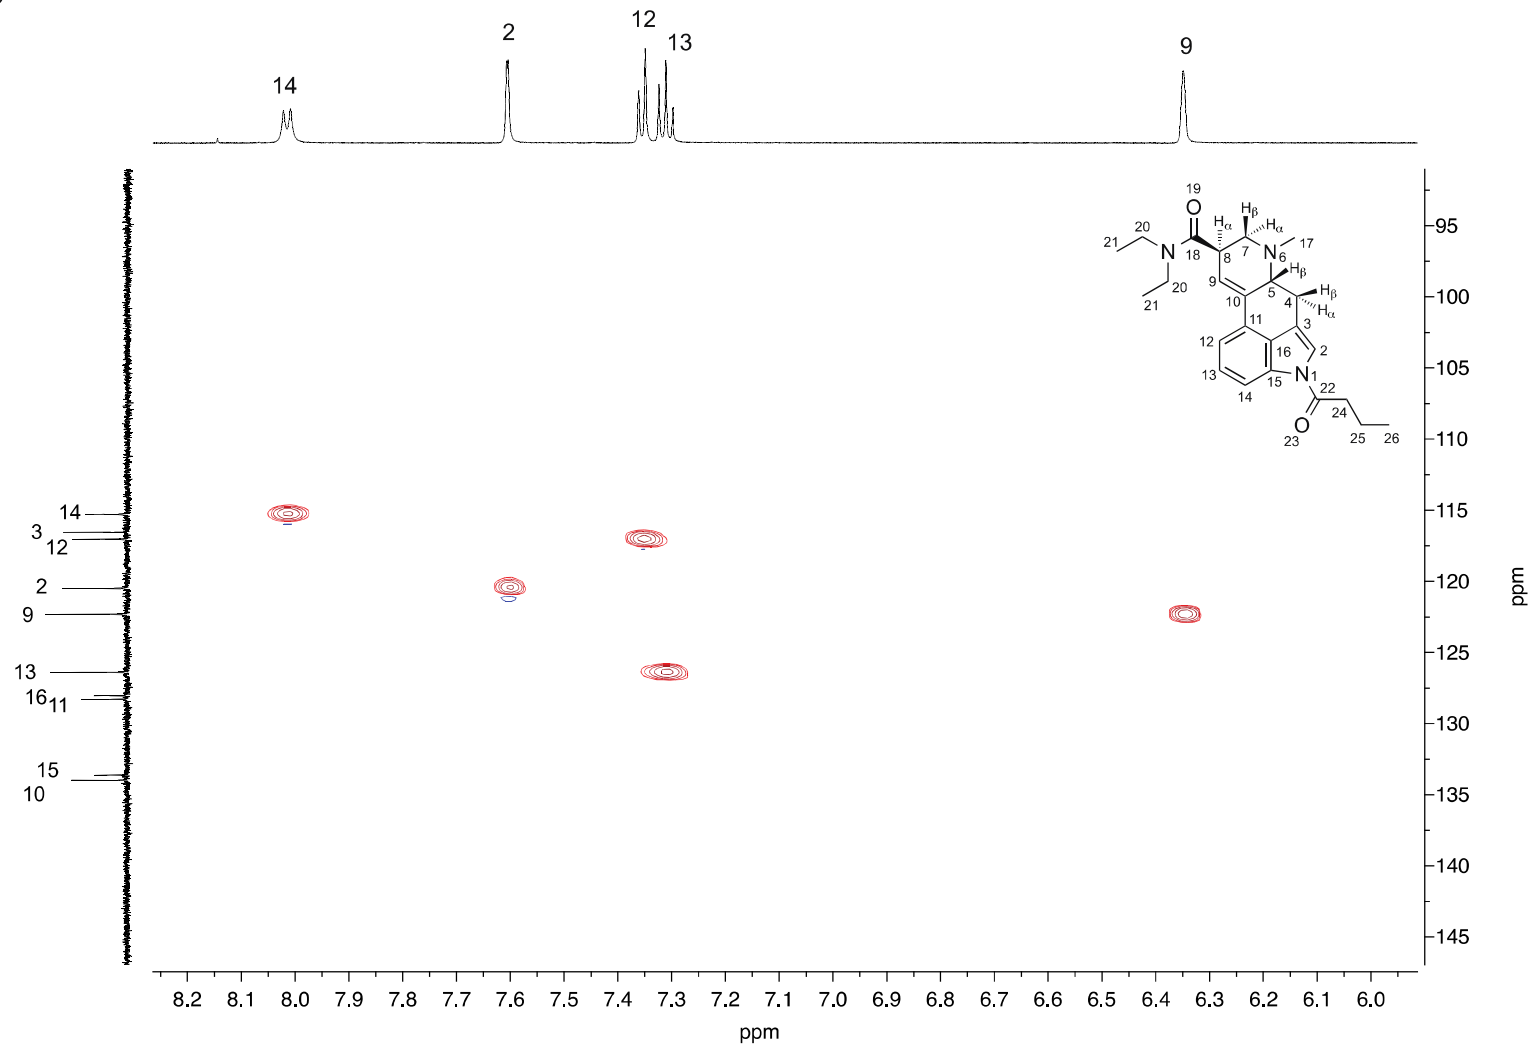

# Supporting Information – Drug Testing and Analysis

1B-LSD hemitartrate (2:1)  
 HSQC (600/150 MHz)  
 d<sub>6</sub>-DMSO

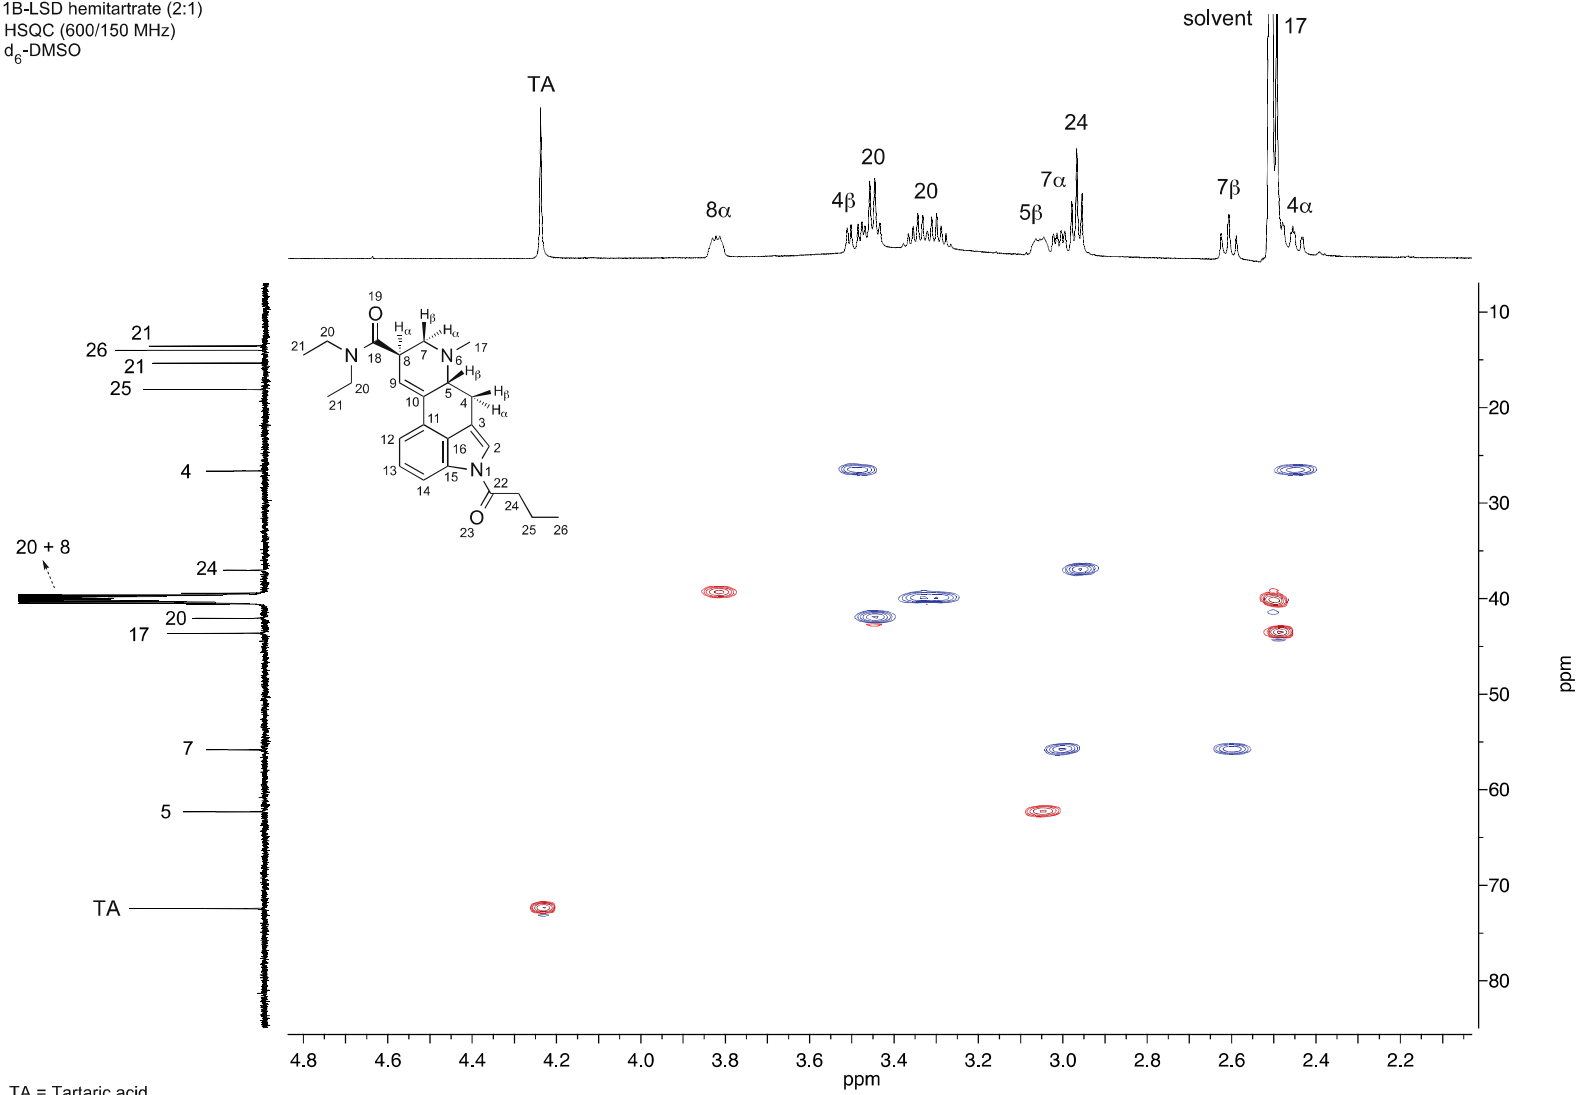



# Supporting Information – Drug Testing and Analysis

1B-LSD hemitartrate (2:1)  
HSQC (600/150 MHz)  
d<sub>6</sub>-DMSO

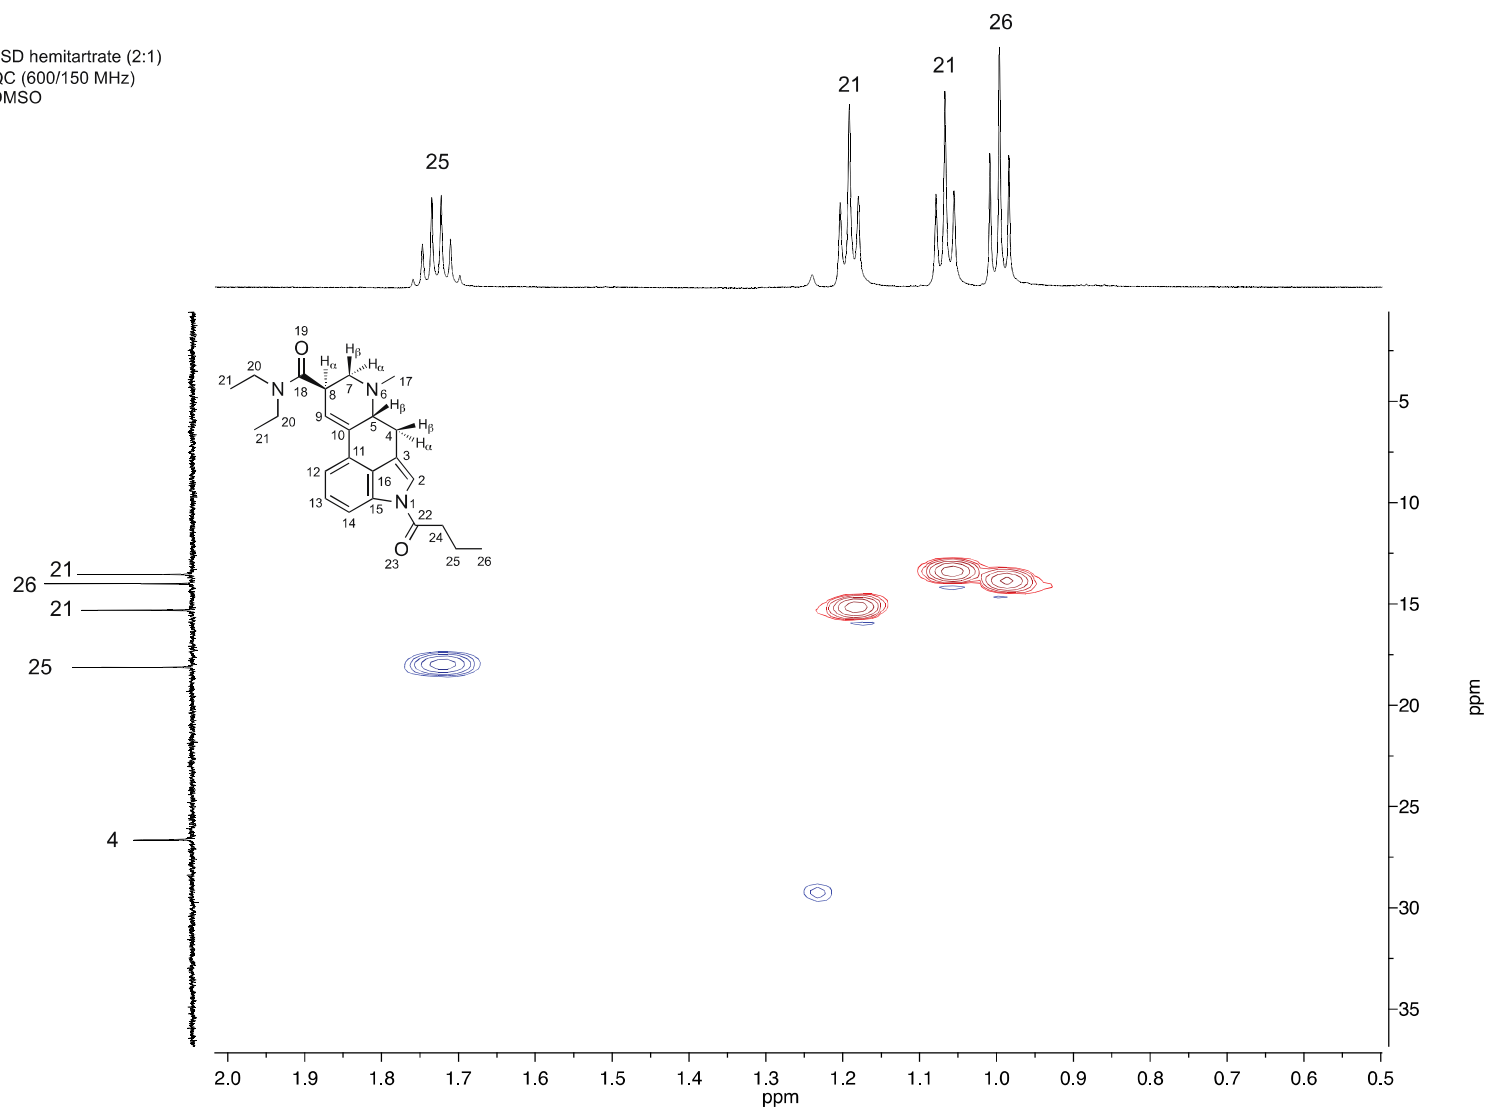

# Supporting Information – Drug Testing and Analysis

1B-LSD hemitartrate (2:1)  
HMBC (600/150 MHz)  
d<sub>6</sub>-DMSO

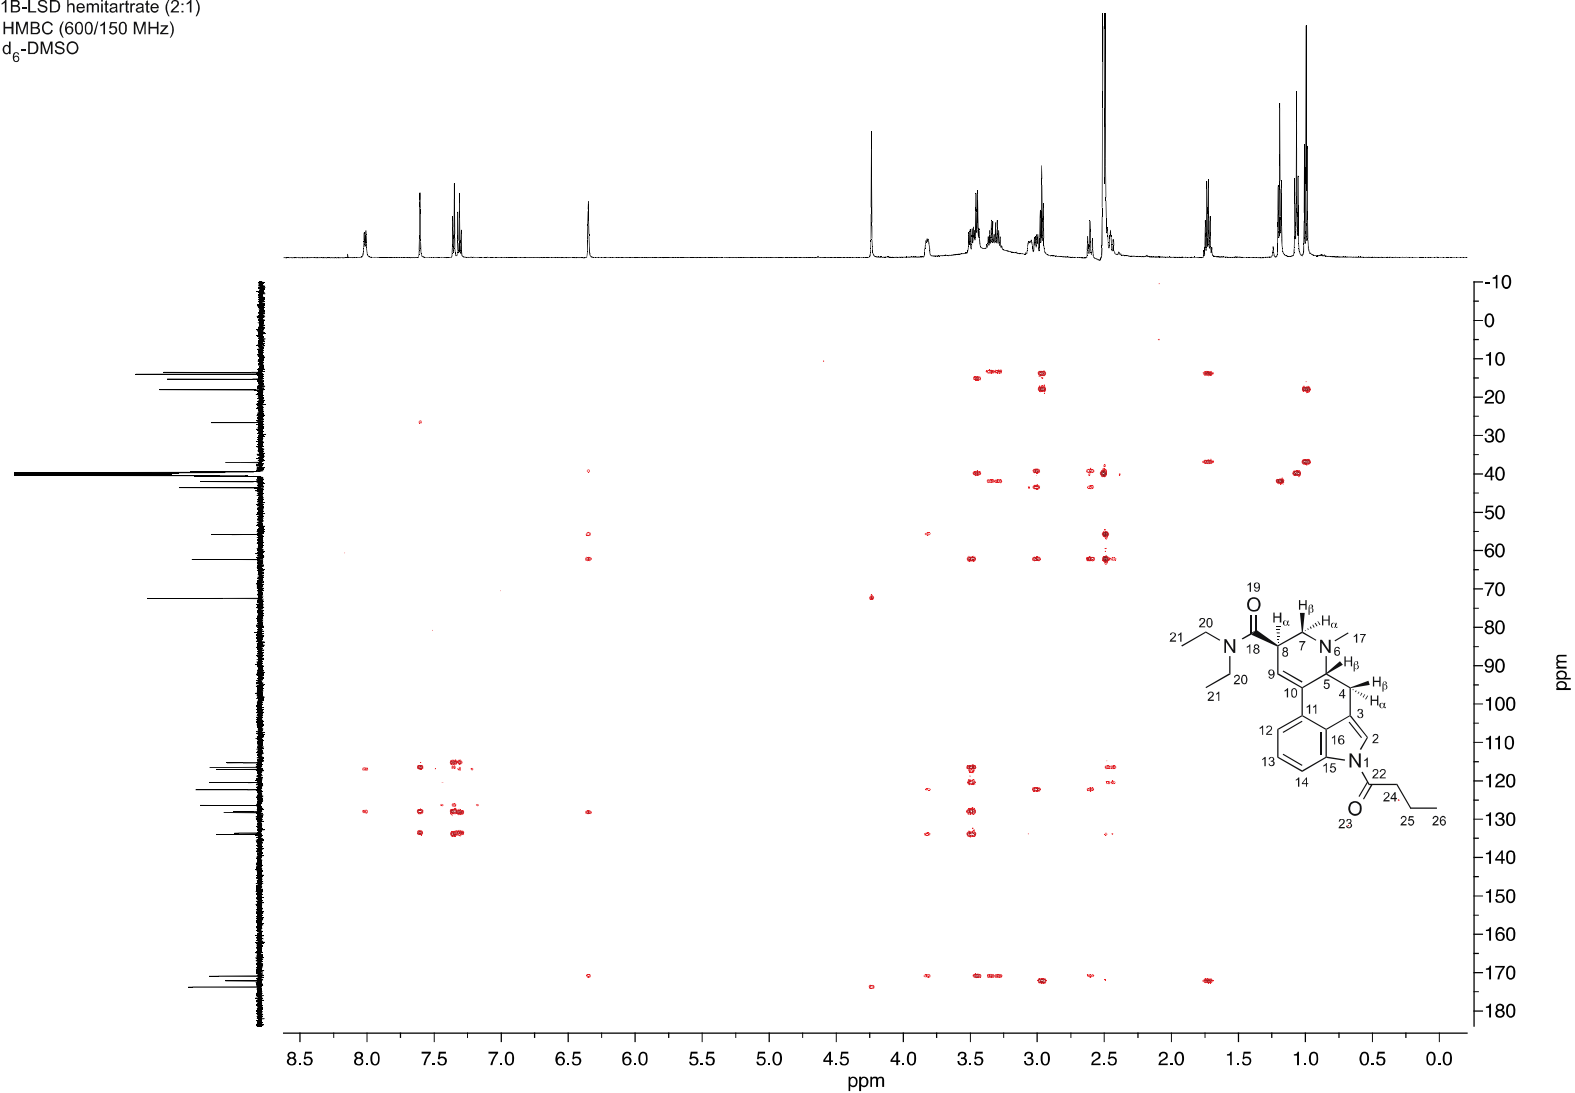

# Supporting Information – Drug Testing and Analysis

1B-LSD hemitartrate (2:1)  
 HMBC (600/150 MHz)  
 d<sub>6</sub>-DMSO

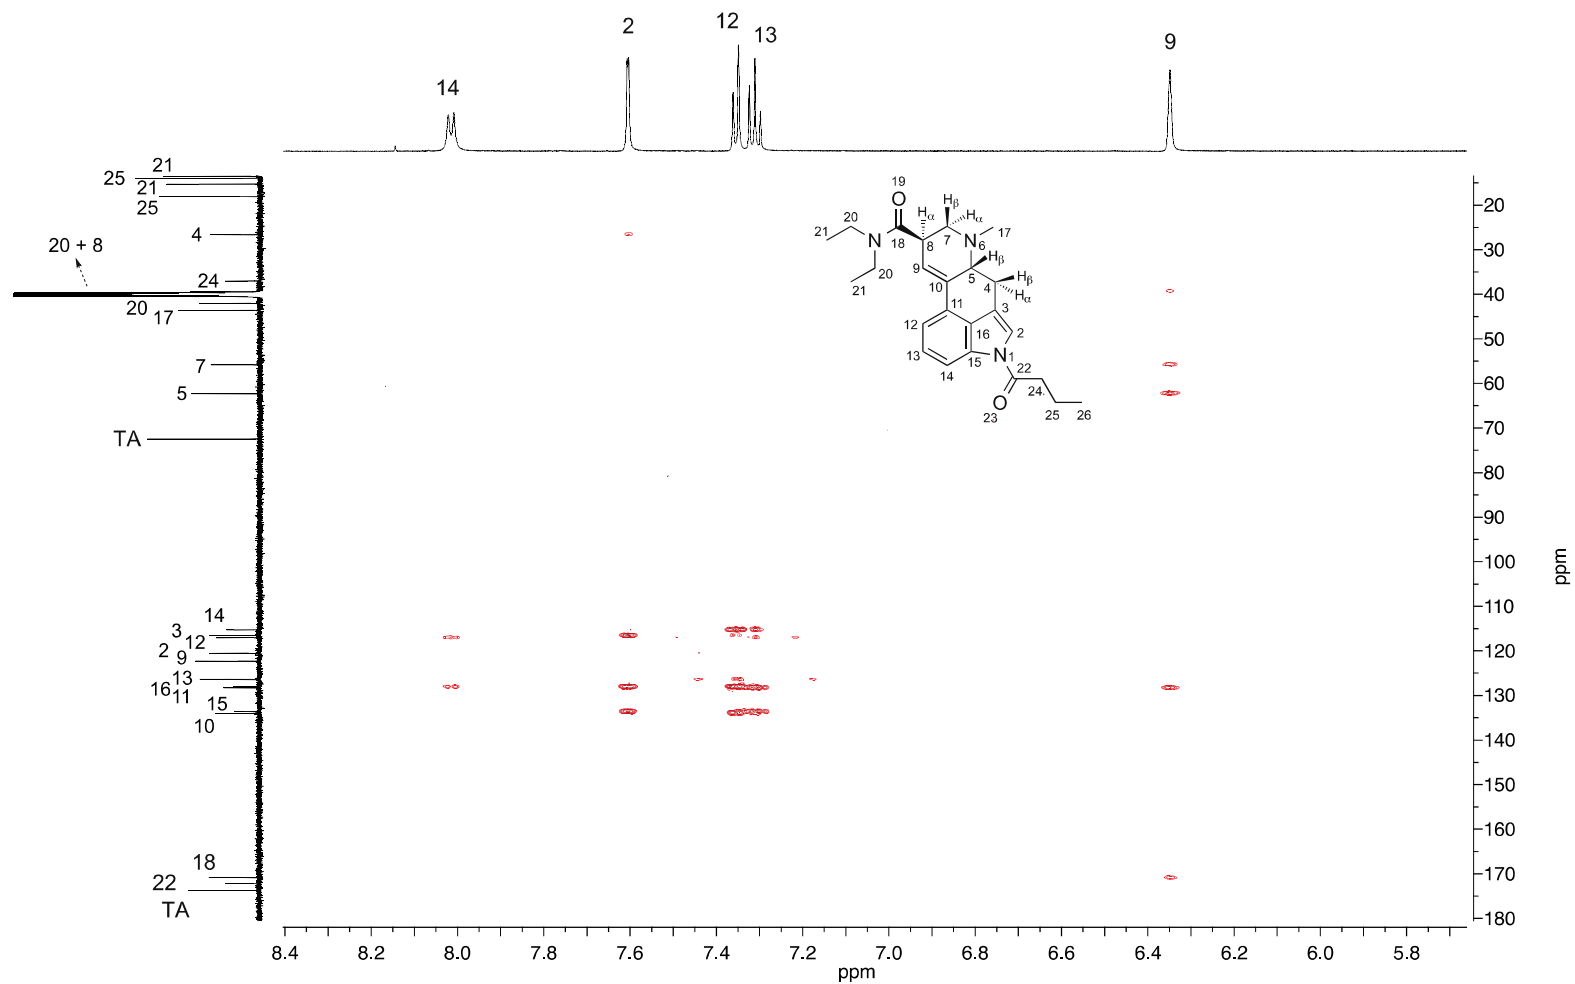

TA = Tartaric acid

# Supporting Information – Drug Testing and Analysis

1B-LSD hemitartrate (2:1)  
 HMBC (600/150 MHz)  
 d<sub>6</sub>-DMSO

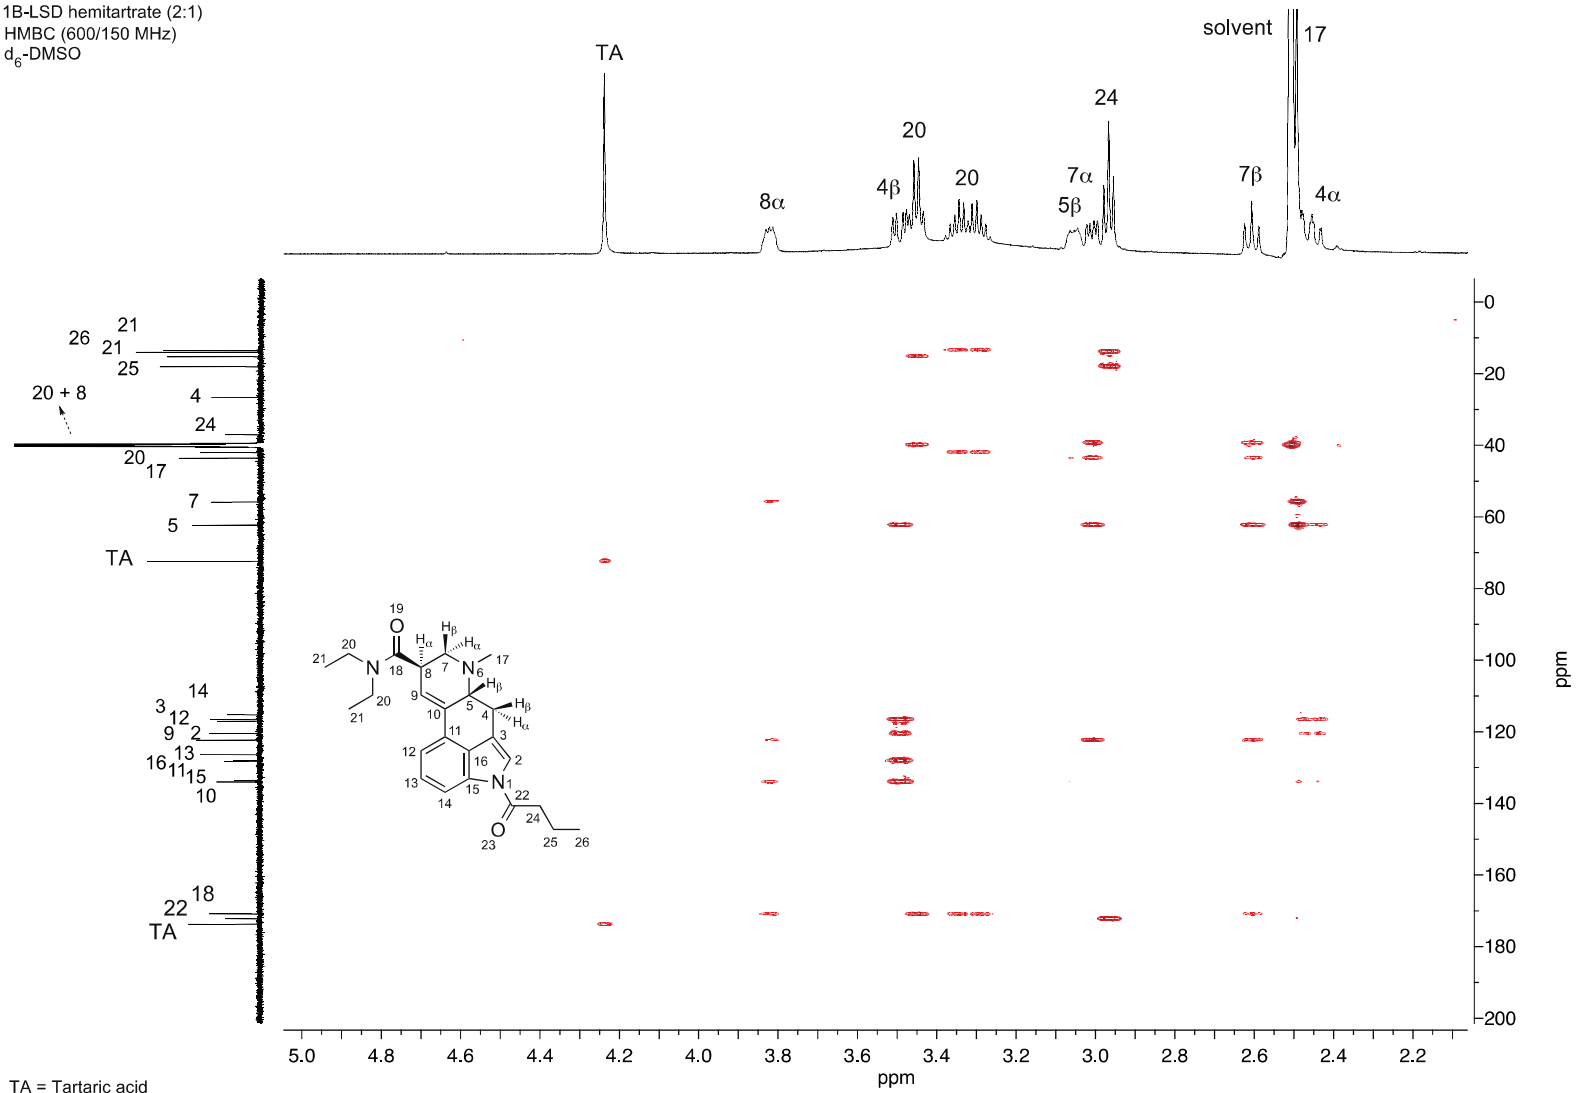

TA = Tartaric acid

# Supporting Information – Drug Testing and Analysis

1B-LSD hemitartrate (2:1)  
 HMBC (600/150 MHz)  
 d<sub>6</sub>-DMSO

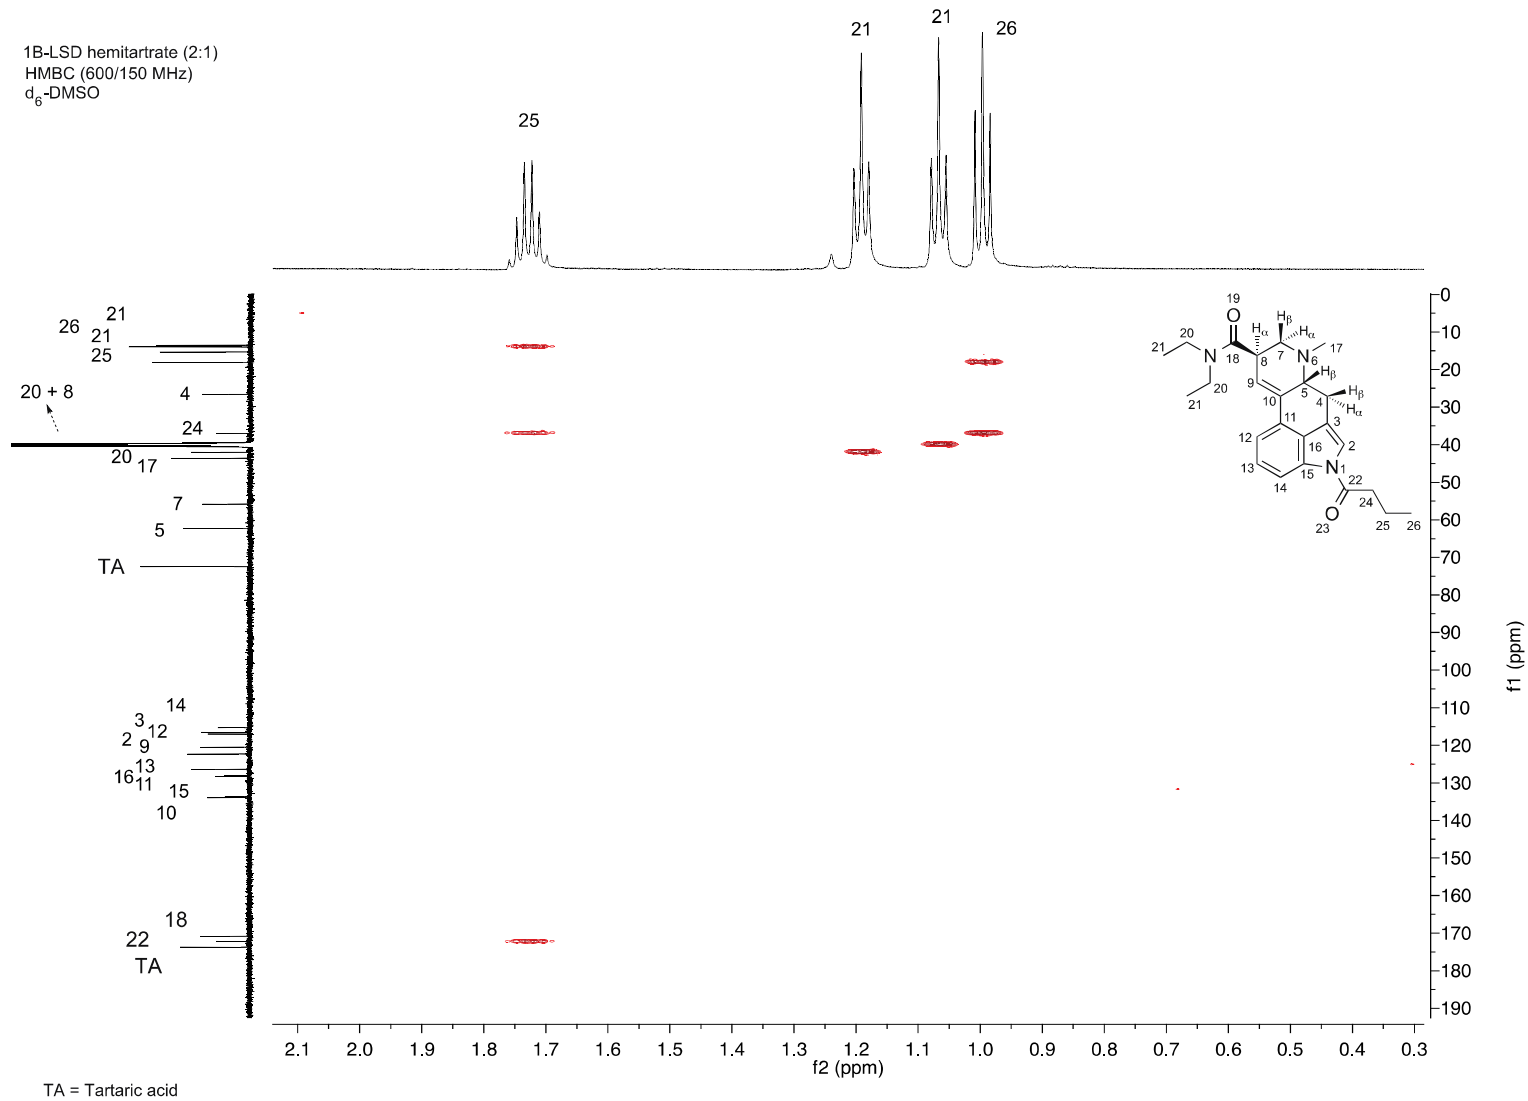

# Supporting Information – Drug Testing and Analysis

1B-LSD hemitartrate (2:1)  
<sup>1</sup>H-NMR (600 MHz)  
d<sub>6</sub>-DMSO

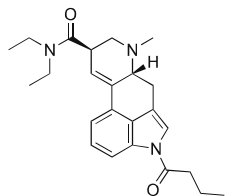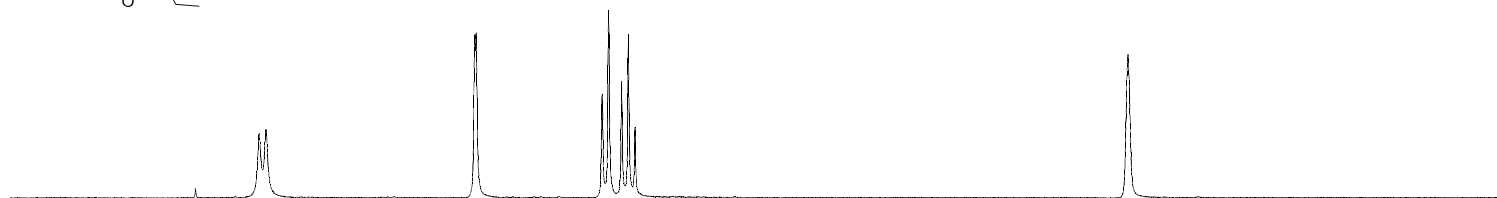

1P-ETH-LAD hemitartrate (2:1)  
<sup>1</sup>H-NMR (600 MHz)  
d<sub>6</sub>-DMSO

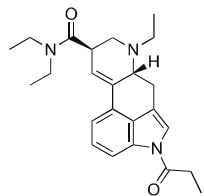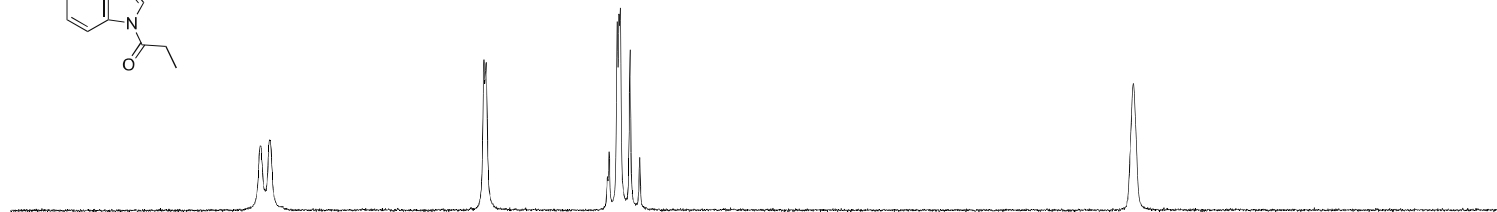

8.4 8.2 8.0 7.8 7.6 7.4 7.2 7.0 6.8 6.6 6.4 6.2 6.0 5.8  
ppm

# Supporting Information – Drug Testing and Analysis

1B-LSD hemitartrate (2:1)  
<sup>1</sup>H-NMR (600 MHz)  
d<sub>6</sub>-DMSO

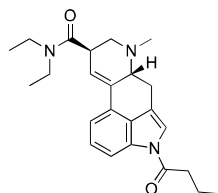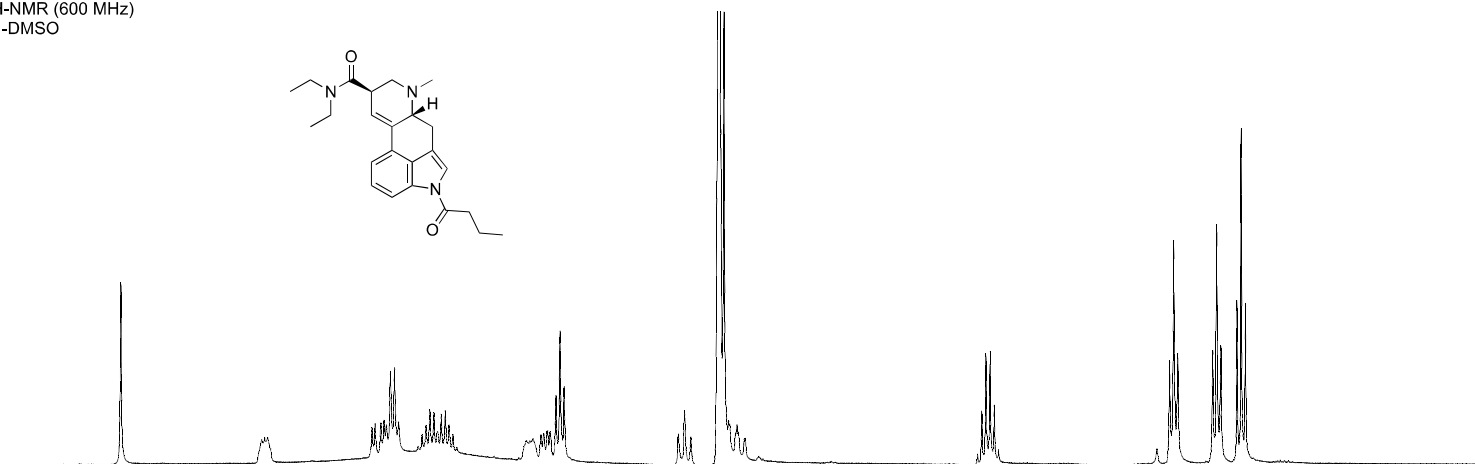

1P-ETH-LAD hemitartrate (2:1)  
<sup>1</sup>H-NMR (600 MHz)  
d<sub>6</sub>-DMSO

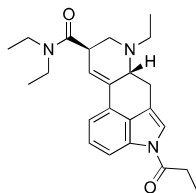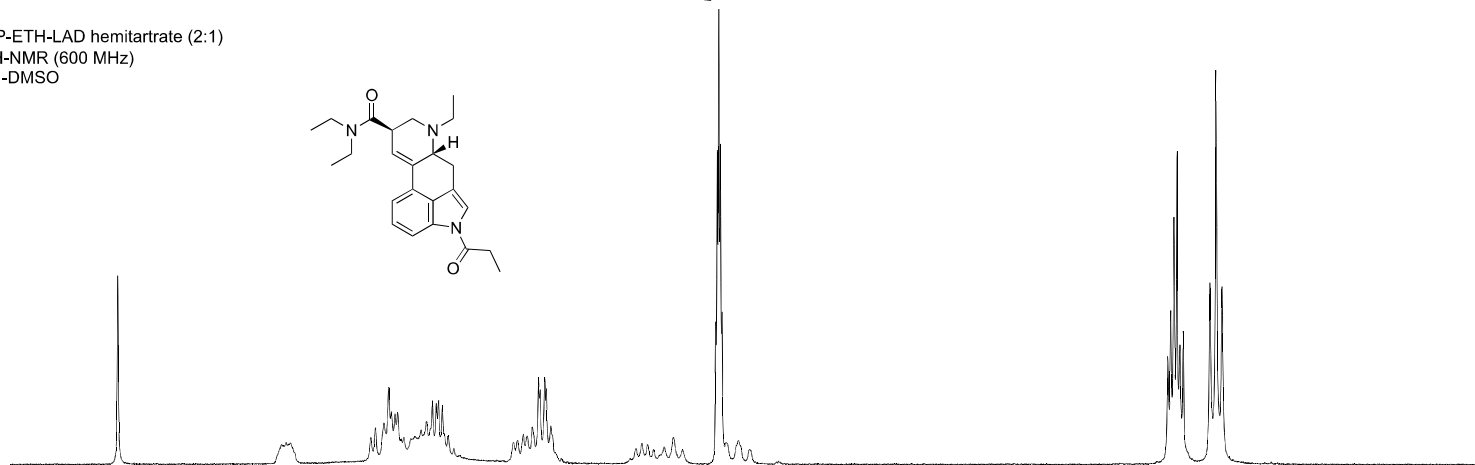

4.4 4.2 4.0 3.8 3.6 3.4 3.2 3.0 2.8 2.6 2.4 2.2 2.0 1.8 1.6 1.4 1.2 1.0 0.8 0.6 0.4  
ppm

# Supporting Information – Drug Testing and Analysis

1B-LSD hemitartrate (2:1)  
<sup>13</sup>C-NMR (600 MHz)  
d<sub>6</sub>-DMSO

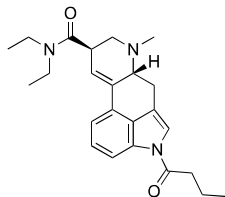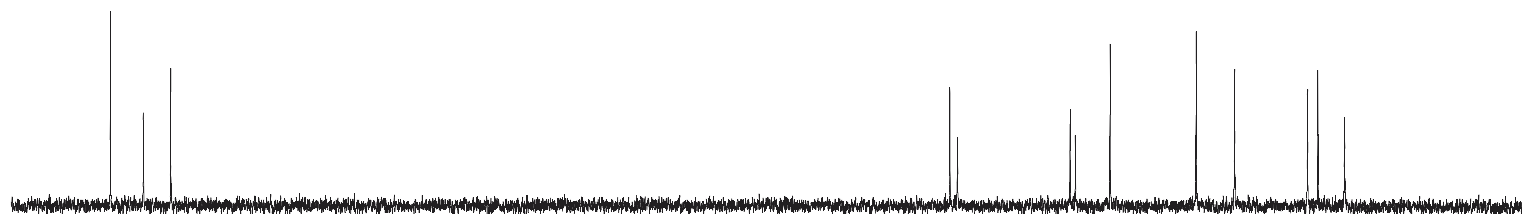

1P-ETH-LAD hemitartrate (2:1)  
<sup>13</sup>C-NMR (600 MHz)  
d<sub>6</sub>-DMSO

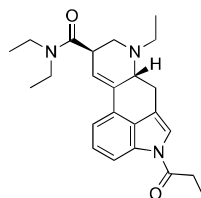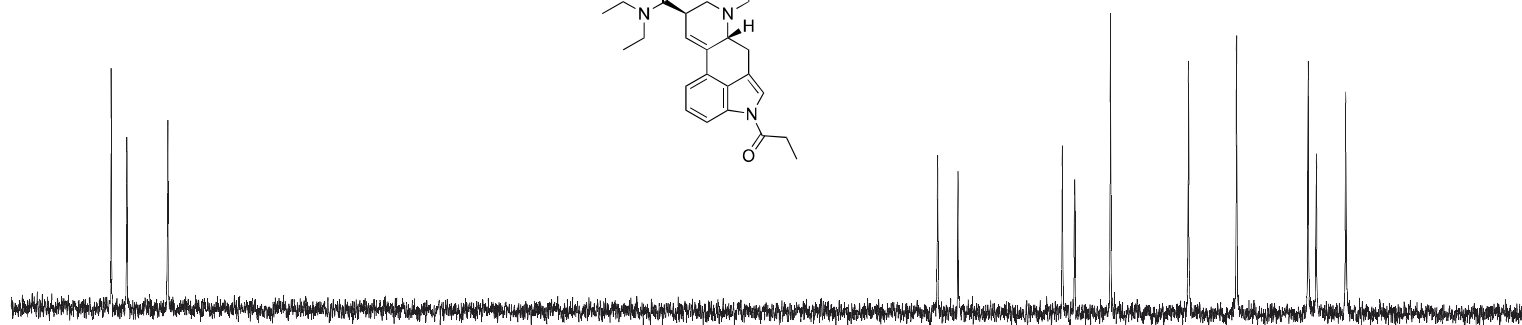

175 170 165 160 155 150 145 140 135 130 125 120 115 110  
ppm



# Supporting Information – Drug Testing and Analysis

1B-LSD hemitartrate (2:1)  
<sup>13</sup>C-NMR (600 MHz)  
d<sub>6</sub>-DMSO

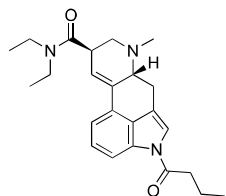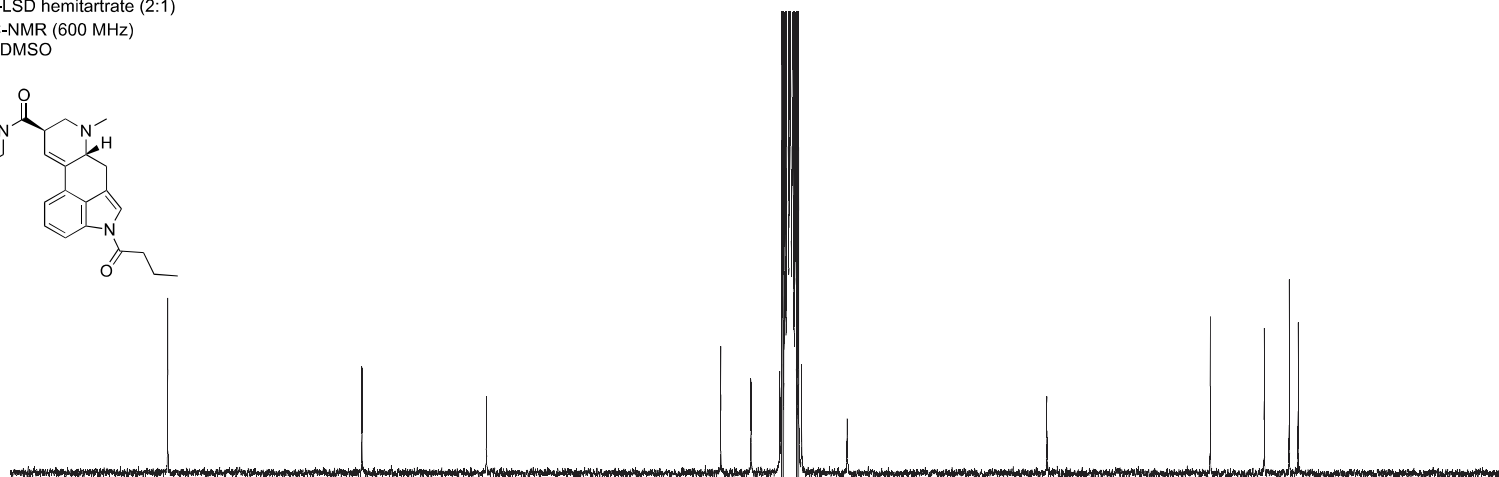

1P-ETH-LAD hemitartrate (2:1)  
<sup>13</sup>C-NMR (600 MHz)  
d<sub>6</sub>-DMSO

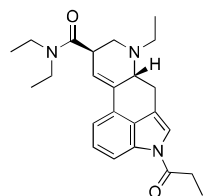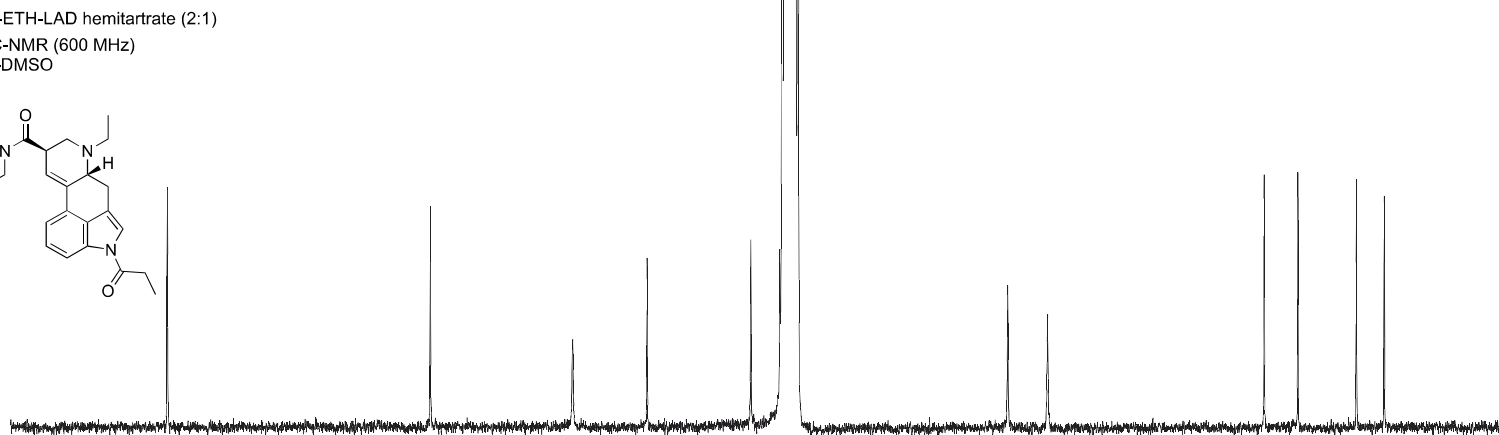

80 75 70 65 60 55 50 45 40 35 30 25 20 15 10 5  
ppm
